# 1 **ComM is a hexameric helicase that promotes branch migration during** 2 **natural transformation in diverse Gram-negative species**

3

4 Thomas M. Nero<sup>1</sup>, Triana N. Dalia<sup>1</sup>, Joseph Che-Yen Wang<sup>2</sup>, David T. Kysela<sup>1</sup>, Matthew L.  
5 Bochman<sup>3,\*</sup>, and Ankur B. Dalia<sup>1,\*</sup>

6

7 <sup>1</sup>Department of Biology, <sup>2</sup>Electron Microscopy Center, <sup>3</sup>Molecular and Cellular Biochemistry  
8 Department, Indiana University, Bloomington, IN 47401

9

10 \*Authors for correspondence – Ankur B. Dalia, [ankdalia@indiana.edu](mailto:ankdalia@indiana.edu), and Matthew L.

11 Bochman, [bochman@indiana.edu](mailto:bochman@indiana.edu)

12

## 13 **ABSTRACT**

14 Acquisition of foreign DNA by natural transformation is an important mechanism of adaptation  
15 and evolution in diverse microbial species. Here, we characterize the mechanism of ComM, a  
16 broadly conserved AAA+ protein previously implicated in homologous recombination of  
17 transforming DNA (tDNA) in naturally competent Gram-negative bacterial species. *In vivo*, we  
18 found that ComM was required for efficient comigration of linked genetic markers in *Vibrio*  
19 *cholerae* and *Acinetobacter baylyi*, which is consistent with a role in branch migration. Also,  
20 ComM was particularly important for integration of tDNA with increased sequence heterology,  
21 suggesting that its activity promotes the acquisition of novel DNA sequences. *In vitro*, we  
22 showed that purified ComM binds ssDNA, oligomerizes into a hexameric ring, and has  
23 bidirectional helicase and branch migration activity. Based on these data, we propose a model  
24 for tDNA integration during natural transformation. This study provides mechanistic insight into  
25 the enigmatic steps involved in tDNA integration and uncovers the function of a protein  
26 required for this conserved mechanism of horizontal gene transfer.

27

28

29

## 30 INTRODUCTION

31 Natural competence is a physiological state in which some bacterial species can take up free  
32 DNA from the environment. Some competent species regulate the genes required for this  
33 process and, depending on the organism, competence can be induced in response to the  
34 availability of certain nutrients, quorum sensing pathways, or by DNA damage / stress (1). The  
35 Gram-negative bacterium *Vibrio cholerae* is activated for competence during growth on chitin,  
36 a polymer of  $\beta$ 1,4-linked N-acetyl glucosamine (2). Chitin is the primary constituent of  
37 crustacean exoskeletons and is commonly found in the aquatic environment where this  
38 facultative pathogen resides. Soluble chitin oligosaccharides indirectly induce expression of  
39 TfoX, the master regulator of competence (3,4), which regulates expression of competence-  
40 related genes in concert with HapR, the master regulator of quorum sensing (5,6).

41 *Acinetobacter baylyi* ADP1, on the other hand, is a naturally competent Gram-negative microbe  
42 that is constitutively active for competence throughout exponential growth (7).

43

44 During competence, dsDNA is bound extracellularly, however, only a single strand of this DNA is  
45 transported into the cytoplasm. Competent bacterial species may use this ingested DNA as a  
46 source of nutrients, however, if this DNA has sufficient homology to the host chromosome, the  
47 incoming DNA can also be integrated into the bacterial genome by homologous recombination  
48 (8). This process of DNA uptake and integration is referred to as natural transformation. As a  
49 result, natural transformation is an important mechanism of horizontal gene transfer and can  
50 lead to the repair of damaged DNA or facilitate acquisition of novel genetic information.

51 Homologous recombination of single-stranded transforming DNA (tDNA) with the host  
52 chromosome requires the function of RecA, which facilitates homology searching and initiates  
53 strand invasion of tDNA through the formation of a displacement loop (D-loop). Following RecA  
54 mediated strand invasion, DNA junctions of this D-loop can then be moved in a process known  
55 as branch migration to increase or decrease the amount of tDNA integrated. Then, by a  
56 presently unresolved mechanism, this intermediate is resolved to stably integrate tDNA into the  
57 host chromosome. The molecular details involved in the integration of tDNA downstream of  
58 RecA strand invasion, however, are poorly understood.

59

60 One previously studied gene from the competent species *Haemophilus influenzae*, *comM*, is not  
61 required for DNA uptake but is required for the integration of tDNA into the host chromosome,  
62 a phenotype consistent with ComM playing a role in homologous recombination during natural  
63 transformation (9). The function of ComM, however, has remained unclear. Here, through both  
64 *in vivo* and *in vitro* characterization of ComM in *V. cholerae* and *A. baylyi*, we uncover that this  
65 protein functions as a hexameric helicase to aid in branch migration during this conserved  
66 mechanism of horizontal gene transfer.

67

## 68 **MATERIALS AND METHODS**

### 69 Bacterial strains and growth conditions

70 The parent *V. cholerae* strain used throughout this study is E7946 (10), while the *A. baylyi* strain  
71 used is ADP1 (also known as BD413) (11). A description of all strains used in this study are listed  
72 in Table S1. Strains were routinely grown in LB broth and plated on LB agar. When required,  
73 media was supplemented with 200 µg/mL spectinomycin, 50 µg/mL kanamycin, 100 µg/mL  
74 carbenicillin, 10 µg/mL trimethoprim, or 40 µg/mL X-Gal.

75

### 76 Construction of mutants and transforming DNA

77 Linear PCR product was constructed using splicing-by-overlap extension PCR exactly as  
78 previously described (12). All primers used to construct and detect mutant alleles are described  
79 in **Table S2**. The pBAD18 Kan plasmid used as tDNA was purified from TG1, a *recA+* *E. coli* host.  
80 Mutants were made by cotransformation exactly as previously described (13).

81

### 82 Transformation assays

83 Transformation assays of *V. cholerae* on chitin were performed exactly as previously described  
84 (3). Briefly,  $\sim 10^8$  CFU of mid-log *V. cholerae* were incubated statically in instant ocean (IO)  
85 medium (7g/L; aquarium systems) containing chitin from shrimp shells (Sigma) for 16-24 hours  
86 at 30°C. Then, tDNA was added (500 ng for linear products containing an antibiotic resistance  
87 cassette inserted at the non-essential locus VC1807 and 1500 ng for plasmid DNA), and

88 reactions were incubated at 30°C for 5-16 hours. Reactions were outgrown with the addition of  
89 LB medium to each reaction by shaking at 37°C for 1-3 hours and then plated for quantitative  
90 culture onto medium to select for the tDNA (transformants) or onto plain LB (total viable  
91 counts). Transformation efficiency is shown as the number of transformants / total viable  
92 counts. In cases where no colonies were observed, efficiencies were denoted as below the limit  
93 of detection (LOD) for the assay.

94  
95 Chitin-independent transformation assays were performed exactly as previously described  
96 using strains that contain an IPTG inducible P<sub>tac</sub> promoter upstream of the native TfoX gene  
97 (14). Briefly, strains were grown overnight with 100 μM IPTG. Then, ~10<sup>8</sup> cells were diluted into  
98 instant ocean medium, and tDNA was added. Reactions were incubated statically for 5 hours  
99 and then outgrown by adding LB and shaking at 37°C for 1-3 hours. Reactions were plated for  
100 quantitative culture as described above.

101  
102 For transformation of *A. baylyi* ADP1, strains were grown overnight in LB media. Then, ~10<sup>8</sup>  
103 cells were diluted into fresh LB medium, and tDNA was added (~100ng). Reactions were  
104 incubated at 30°C with agitation for 5 hours and then plated for quantitative culture as  
105 described above.

106  
107 *Protein expression and purification*

108 ComM and Pif1 were cloned into StrepII expression vectors, expressed in Rosetta 2(DE3) pLysS  
109 cells using autoinduction medium (15), and purified using Strep-Tactin Sepharose (IBA). ComM  
110 protein preparations lacked detectable nuclease activity. For details please see **Supplementary**  
111 **Methods**.

112  
113 *Electrophoretic mobility shift assay*

114 The ssDNA probe (BBC742) and dsDNA probe (annealed BBC742 and BBC743) were labeled  
115 using Cy5 dCTP (GE Healthcare) and Terminal deoxynucleotidyl Transferase (TdT; Promega).  
116 Reactions were composed of 10 mM Tris-HCl pH 7.5, 20 mM KCl, 1 mM DTT, 10% Glycerol, 100

117  $\mu\text{g/ml}$  BSA, 9 nM Cy5 labeled probe, purified ComM protein at the indicated concentration, and  
118 0.1 mM ATP where indicated. Reactions were incubated at RT for 30 minutes and run on 8%  
119 Tris-borate acrylamide gel at 150 V for 45 min. Probes were detected using a Chemidoc MP  
120 imaging system (Biorad).

121

### 122 Blue native PAGE

123 Blue native PAGE was performed essentially as previously described (16). Purified ComM (2.5  
124  $\mu\text{M}$ ) was incubated for 30 min at room temperature in reaction buffer [10 mM Tris-HCl pH 7.5,  
125 20 mM KCl, 1 mM DTT, 10% Glycerol] with 5 mM ATP and/or 5  $\mu\text{M}$  ssDNA (oligo ABD363) where  
126 indicated. For additional details see **Supplementary Methods**.

127

### 128 Negative stain electron microscopy

129 For negative stain electron microscopy, sample was prepared by applying 4  $\mu\text{L}$  of ComM-ATP-  
130 ssDNA solution onto a glow-discharged continuous carbon film coated copper grid (EMS) and  
131 stained with 0.75% (w/v) uranyl formate. EM micrographs were acquired using a 300 kV JEM-  
132 3200FS electron microscopy with 20-eV energy slit under low dose conditions ( $\leq 20 \text{ e}^-/\text{\AA}^2$ ) on a  
133 Gatan UltraScan 4000 4k x 4k CCD camera. Additional details for EM image collection and  
134 analysis are provided in the **Supplementary Methods**. The EM electron density map has been  
135 deposited to EMDDataBank.org with the accession number EMD-8575.

136

### 137 Phylogenetic Trees

138 ComM homologs were identified using a protein BLAST search of diverse bacterial genomes  
139 followed by phylogenetic analysis. Starting with a broadly representative set of genomes  
140 adapted from Wu and Eisen (17), an initial ComM candidate pool was generated from a  
141 comprehensive protein BLAST search of all predicted CDS translations against the *V. cholerae*  
142 ComM allele with a 0.001 e-value cutoff. Subsequent sequence alignment with MUSCLE (18)  
143 and maximum likelihood phylogenetic reconstruction with FastTree (19) identified a single  
144 clade of alleles with high sequence similarity (generally well above 50%) to *V. cholerae* ComM  
145 (data not shown), with the remaining alleles excluded from further analysis. After manually

146 pruning divergent alleles with alignments covering <70% of ComM, the retained sequences  
147 comprised the set of true ComM orthologs used in the final sequence alignment and ComM  
148 phylogeny reconstruction. For whole genome phylogenetic reconstruction, Phylosift (20)  
149 identified and aligned a default set of 36 highly conserved marker genes. FastTree was used for  
150 initial reconstruction, whereas RAxML (21) subsequently estimated the maximum likelihood  
151 phylogeny for a reduced set of representative genomes under the LG (22) substitution model  
152 with gamma-distributed rate variation.

153

#### 154 *Helicase and branch migration assays*

155 Helicase assay substrates were 5' end-labeled with T4 polynucleotide kinase (T4 PNK; NEB) and  
156  $\gamma$ [<sup>32</sup>P]-ATP. The 2-strand forked helicase substrates was annealed by combining equimolar  
157 amounts of a labeled oligonucleotide with the unlabeled complement and incubating at 37°C  
158 overnight.

159

160 The short 3-strand branch migration substrates were constructed in a 2-step annealing process.  
161 First, we incubated equimolar amounts of a labeled strand and unlabeled partial complement  
162 at 95°C for 5 min. and then slow cooled to 25°C to create a forked substrate. An equimolar  
163 amount of a third strand was then added to the resulting forked product and incubated  
164 overnight at 37°C. Following annealing, the three-stranded products were PAGE purified.  
165 Primers used for all probes and additional details can be found in the **Supplementary Methods**.  
166 Helicase and branch migration activity was then assessed by incubating the indicated  
167 concentrations of ComM, Pif1, or Hrq1 with 5 mM ATP and 0.1 nM DNA substrate in  
168 resuspension buffer (25 mM Na-HEPES (pH 7.5), 5% (v/v) glycerol, 300 mM NaOAc, 5 mM  
169 MgOAc, and 0.05% Tween-20). Reactions were incubated at 37°C for 30 min and stopped with  
170 the addition of 1x Stop-Load dye (5% glycerol, 20 mM EDTA, 0.05% SDS, and 0.25%  
171 bromophenol blue) supplemented with 400  $\mu$ g/mL SDS-Proteinase K followed by a 10-min  
172 incubation at 37°C. Reactions were then separated on 8% 19:1 acrylamide:bis-acrylamide gels  
173 in TBE buffer at 10 V/cm. Gels were then dried between layers of Whatman filter paper under  
174 vacuum at 55°C for 20 mins and then exposed to a phosphor imaging screen for 24-48 hours

175 prior to scanning on a Typhoon 9210 Variable Mode Imager to image radiolabeled DNA probes.  
176 DNA unwinding and branch migration were quantified using ImageQuant 5.2 software.

177

178 The long 3-strand recombination intermediates were generated by RecA-mediated strand  
179 exchange between circular single-stranded  $\phi$ X174 virion DNA (NEB) and PstI-linearized double-  
180 stranded  $\phi$ X174 DNA (NEB) essentially as previously described (23). Briefly, recombination  
181 reactions were conducted in strand exchange buffer (25 mM Tris acetate pH 8.0, 1mM DTT, 1%  
182 glycerol, 10 mM magnesium acetate, 3 mM potassium glutamate, 10 U/mL creatine  
183 phosphokinase, 12.5 mM phosphocreatine, and 50  $\mu$ g/mL acetylated BSA). First, 7.1  $\mu$ M RecA  
184 (NEB) was incubated with 44  $\mu$ M (in nucleotides) circular single-stranded  $\phi$ X174 virion DNA  
185 (CSS) at 37°C for 10 mins. Then, 2 mM ATP and  $\sim$ 0.84  $\mu$ M SSB (Promega) were added to the  
186 reaction and incubated at 37°C for 8 mins. Finally, the strand exchange reactions were started  
187 by the addition of  $\sim$ 16.7  $\mu$ M (in nucleotides) of PstI-linearized  $\phi$ X174 and incubated at 37°C for  
188 an additional 20 mins to allow for the generation of recombination intermediates. Reactions  
189 were then deproteinated and cleaned up using a PCR purification kit (Qiagen). To assess branch  
190 migration of recombination intermediates, the deproteinated DNA was then incubated with  
191 ComM in strand exchange buffer containing 5 mM ATP at 37°C for 10 mins. Reactions were  
192 then stopped using 1X stop load dye and separated on a 0.8% agarose gel in TAE. Gels were  
193 then stained with GelGreen (Biotium), and scanned on a Typhoon 9210 Variable Mode Imager.

194

#### 195 DNA damage assay

196 For DNA damage assays,  $\sim$ 10<sup>8</sup> cells of a midlog *Vibrio cholerae* culture in instant ocean medium  
197 were treated with the indicated concentration of MMS or MMC for 1 hour at 30°C. To  
198 determine viable counts, reactions were plated for quantitative culture on LB agar.

199

#### 200 GFP-ComM western blots

201 The indicated strains of *V. cholerae* were grown with or without 100  $\mu$ M IPTG. Cell lysates were  
202 run on 10% SDS PAGE gels and electrophoretically transferred to PVDF. This membrane was  
203 then blotted with primary rabbit anti-GFP (Invitrogen) or mouse anti-RpoA (Biolegend)

204 antibodies and a goat anti-rabbit or anti-mouse IRDye 800CW (LI-COR) secondary as  
205 appropriate. Bands were detected using a LI-COR Odyssey classic infrared imaging system.

206

## 207 **RESULTS**

### 208 *ComM is required for integration of tDNA during natural transformation*

209 Previously, we performed an unbiased transposon-sequencing screen (Tn-seq) in *V. cholerae* to  
210 identify genes involved in natural transformation (3). One gene identified in that screen was  
211 VC0032, which encodes a homolog of *comM* from *H. influenzae*. ComM was previously  
212 implicated in the integration of tDNA during natural transformation in *H. influenzae* (9). To  
213 determine if this was also the case in *V. cholerae*, we performed chitin-dependent natural  
214 transformation assays using two distinct sources of tDNA. One was a linear PCR product that  
215 inserts an antibiotic resistance cassette at a non-essential locus, while the other was a  
216 replicating plasmid that lacks any homology to the host genome. We hypothesized that  
217 transformation with linear product requires both DNA uptake and chromosomal integration,  
218 while transformation with the plasmid only requires DNA uptake. To test this, we transformed a  
219 recombination deficient  $\Delta recA$  strain of *V. cholerae*, and found that, as expected, this strain  
220 could not be transformed with linear product but could be transformed with a replicating  
221 plasmid, consistent with plasmid transformation being recombination-independent (**Fig. S1**).  
222 Additionally, plasmid transformation in this assay is dependent on natural competence, as  
223 mutants in genes required for uptake ( $\Delta pilA$ ) (5) and cytoplasmic protection ( $\Delta dprA$ ) of tDNA  
224 are not transformed (5,24,25) (**Fig. S1**). Using this assay, we find that a *comM* mutant  
225 ( $\Delta VC0032$ ) in *V. cholerae* displays a ~100-fold reduction for transformation with linear product,  
226 while rates of plasmid transformation were equal to the WT (**Fig. 1A**). This is consistent with  
227 ComM playing a role downstream of DNA uptake, and potentially during recombination. These  
228 assays were performed on chitin to induce the natural competence of this organism. To  
229 determine if ComM is playing a role specifically downstream of competence induction, we  
230 performed a chitin-independent transformation assay by overexpressing the competence  
231 regulator TfoX. Under these conditions, a *comM* mutant still had reduced rates of  
232 transformation when transformed with a linear PCR product (**Fig. 1B**). Cumulatively, these



233 results are consistent with ComM playing a role in the late steps of transformation downstream  
234 of DNA uptake.

235

236 To confirm that the phenotypes observed are due to mutation of *comM*, we complemented  
237 strains by integrating an IPTG inducible P<sub>*tac*</sub>-*comM* construct at a heterologous site on the  
238 chromosome (at the *lacZ* locus). Our previous work has indicated that this expression construct  
239 is leaky (14) (**Fig. S2**), and consistent with this, we observe complementation even in the  
240 absence of inducer (**Fig. 1C**).

241

242 *ComM promotes branch migration through heterologous sequences in vivo*

243 *V. cholerae* ComM is a predicted AAA+ ATPase, and members of this family have diverse  
244 functions (26). To determine if ComM had structural similarity to any AAA+ ATPase of known  
245 function, we submitted the primary sequence of this protein to the Phyre2 server (27). Despite  
246 a lack of significant homology by BLAST, this analysis revealed structural similarity to MCM2-7,  
247 the replicative helicase of eukaryotes (28,29). As a result, we explored whether ComM  
248 functions as a helicase to promote branch migration during natural transformation.

249

250 To test this *in vivo*, we assessed comigration of linked genetic markers on a linear tDNA product  
251 (**Fig. 2A**). If branch migration during transformation is efficient, we hypothesized that both  
252 markers would be integrated into the host chromosome. However, if branch migration is  
253 inefficient, we hypothesized that we may observe integration of one marker but not the other.

254 For this assay, we generated two tDNA constructs that contained a Spec<sup>R</sup> marker upstream of  
255 *lacZ* as well as a genetically linked point mutation in the *lacZ* gene that was either 820bp or  
256 245bp downstream of the Spec<sup>R</sup> marker (**Fig 2A**). We selected for the Spec<sup>R</sup> marker and  
257 screened for integration of the linked *lacZ* mutation as an indirect measure of branch migration.

258 To prevent post-recombination repair of the *lacZ* allele by the mismatch repair (MMR) system,  
259 these experiments were performed in *mutS* mutant backgrounds. As with previous  
260 experiments, a *comM* mutant is severely reduced for transformation efficiency for the Spec<sup>R</sup>  
261 marker compared to the parent (**Fig. 2A, left and 1A**). Of those cells that integrated the Spec<sup>R</sup>

262 marker, the comigration efficiency of the *lacZ* mutation was higher than 90% for both products  
263 (820bp and 245bp) in the parent strain background (**Fig. 2A, right**), which is consistent with  
264 highly efficient branch migration in this background. When *comM* is deleted, however, the  
265 comigration efficiency for the *lacZ* mutation drops significantly for both products compared to  
266 the parent strain, and the reduction is more severe for the product where the *lacZ* mutation is  
267 farther away (**Fig. 2A, right**). Cumulatively, these data suggest that *comM* may play a role in  
268 branch migration during natural transformation to increase the amount of tDNA integrated into  
269 the host chromosome.

270

271 To promote horizontal gene transfer, tDNA integrated during natural transformation must be  
272 heterologous to the host chromosome. So next, we decided to test whether ComM promotes  
273 integration of heterologous tDNA. To that end, we created strains that contain an inactivated  
274 Tm<sup>R</sup> marker integrated in the chromosome. The marker was inactivated with either a 29bp  
275 deletion or a nonsense point mutation. We then transformed these strains with tDNA that  
276 would restore the Tm<sup>R</sup> marker. Again, to eliminate any confounding effects of MMR, we  
277 performed these experiments in *mutS* mutant backgrounds. First, we find that integration of a  
278 point mutation is similar to a 29bp insertion in the parent strain background, indicating that in  
279 the presence of ComM, tDNA is efficiently integrated regardless of sequence heterology. In the  
280 *comM* mutant, however, we find that a point mutation is significantly easier to integrate  
281 compared to the 29bp insertion (**Fig. 2B**). This finding is consistent with ComM promoting  
282 branch migration through heterologous sequences during natural transformation; however, in  
283 its absence, the integration of heterologous sequences is unfavored.

284

### 285 *ComM* hexamerizes in the presence of ATP and ssDNA

286 Because our *in vivo* data suggested that ComM acts as a branch migration factor, we next  
287 decided to test the biochemical activity of this protein *in vitro*. First, we determined that N-  
288 terminally tagged ComM (GFP-ComM) was functional *in vivo* while a C-terminally tagged fusion  
289 (ComM-GFP) was not (**Fig. S2**). Furthermore, recent studies indicate that *comM* is part of the  
290 competence regulon (30). Using a strain where *comM* was N-terminally tagged with GFP at the

291 native locus, we found that *comM* protein levels are increased under competence inducing  
292 conditions (TfoX overexpression), indicating that native regulation of tagged *comM* is  
293 maintained (**Fig. S2**).

294  
295 To characterize ComM *in vitro*, we expressed StrepII-ComM (N-terminal tag) in *E. coli* and  
296 purified it to homogeneity. The peak of recombinant ComM eluting from preparative gel  
297 filtration chromatography had a calculated molecular weight of 57 kDa (**Fig. S3**). As the  
298 predicted mass of ComM is 61 kDa, this suggests that ComM exists as a monomer in solution.  
299 Many helicases oligomerize in their active state, including all known MCM family helicases (31).  
300 So, we next tested whether purified ComM oligomerizes *in vitro*. Because ComM is a predicted  
301 ATPase and may interact with DNA, we hypothesized that these factors may be required for its  
302 oligomerization and activity. To assess oligomerization, we performed blue-native PAGE (16). In  
303 this assay, ComM appears to oligomerize robustly in the presence of ATP and ssDNA, with some  
304 oligomerization also observed in the presence of ATP alone (**Fig. 3A**). This latter observation,  
305 however, may be due to a small amount of contaminating ssDNA that remains bound to ComM  
306 during purification. Defining the number of subunits in this oligomer was unreliable by blue-  
307 native PAGE due to lack of resolving power by the gel. However, the higher molecular weight  
308 species generated in the presence of ATP and ssDNA was likely larger than a dimer. Therefore,  
309 we attempted to observe ComM oligomers by negative stain transmission electron microscopy  
310 (TEM). In the absence of ligands, ComM particles were small and uniform, consistent with our  
311 gel filtration results and demonstrated the purity of our protein preparations. In the presence  
312 of ATP and ssDNA, we observed ring-like densities for ComM that upon 2-D averaging revealed  
313 that this protein forms a hexameric ring (**Fig. 3B** and **3C**). Furthermore, we generated a 3-D  
314 reconstruction from the negative stain TEM images of ComM in the presence of ATP and ssDNA  
315 (~13.8 Å resolution, see **Supplementary Methods**), which revealed that ComM forms a three-  
316 tiered barrel-like structure with a large opening on both ends (**Fig. 3D**). The pore on the bottom  
317 of this barrel is ~18Å, which can accommodate ssDNA but not dsDNA, while the 26 Å pore is  
318 able to accommodate dsDNA. The size of these pores, however, may be an underestimate due  
319 to the stain used during EM and/or ssDNA that may be bound and averaged into the 3-D

320 construction. Regardless, these data suggest that ComM forms a hexameric ring, consistent  
321 with structures adopted by many AAA+ helicases (26). ComM also oligomerized in the presence  
322 of ADP and the non-hydrolysable ATP analog AMP-PNP, indicating that ATP is not a strict  
323 requirement for hexamer formation (**Fig. S4**).

324

#### 325 ComM binds ssDNA and dsDNA in the presence of ATP

326 Because ATP was required for oligomerization in the presence of ssDNA, we hypothesized that  
327 it would also be required for DNA binding. To test this, we mutated the conserved lysine in the  
328 Walker A motif of ComM, which in other AAA+ ATPases, promotes ATP binding (26). *In vivo*, we  
329 find that this mutation abrogates ComM function (**Fig. S5A**), while protein stability is  
330 maintained (**Fig. S2**). To determine if ATP binding was required for ComM to bind ssDNA, we  
331 performed electrophoretic mobility shift assays (EMSAs) using purified ComM and ComM<sup>K224A</sup> *in*  
332 *vitro*. We find that WT ComM binds both ssDNA and dsDNA in an ATP-dependent manner (**Fig.**  
333 **S5B-D**). Consistent with this, ComM<sup>K224A</sup> displays greatly reduced ssDNA binding even in the  
334 presence of ATP (**Fig. S5B**). Also, using non-labeled competitor DNA of differing lengths in  
335 EMSAs, we found that ComM preferentially bound ssDNA >60bp in length. Taken together,  
336 these results indicate that ATP is important for ComM to bind DNA and function during natural  
337 transformation.

338

#### 339 ComM has helicase activity in vitro

340 Thus far, our data suggest that ComM may play a role in branch migration *in vivo*. Some branch  
341 migration factors (e.g., RuvAB and RecG (32,33)) display helicase activity. So next, we tested the  
342 helicase activity of purified ComM *in vitro*. We observed enzymatic unwinding of a forked DNA  
343 substrate with increasing concentrations of ComM. Assuming that ComM hexamers are the  
344 active oligomeric form, the helicase activity had an apparent  $K_M$  of 50.8 nM (**Fig. 4A**). As  
345 expected, the purified ATP binding mutant ComM<sup>K224A</sup> did not display helicase activity in this  
346 assay compared to WT ComM and Pif1, a previously characterized helicase (34) that served as a  
347 positive control in these assays (**Fig. 4B**). Furthermore, the non-hydrolysable ATP analog ATP $\gamma$ S

348 inhibited helicase activity, which is consistent with ATP hydrolysis being required for ComM  
349 function (**Fig. 4B**).

350  
351 Most helicases exhibit a preferred directionality (either 5' to 3' or 3' to 5'). A forked DNA  
352 substrate, however, does not distinguish between these activities. To determine whether  
353 ComM had a preferred directionality, we tested helicase activity on forked substrates where  
354 one of the two tails is inverted (by a 3'-3' linkage) relative to the remainder of the oligo (35).  
355 Thus, directional substrates either have two 5' ends (to assess 5' to 3' directionality) or two 3'  
356 ends (to assess 3' to 5' directionality). As controls in these assays, we used the unidirectional  
357 helicases Pif1 (a 5' to 3' helicase (34)) and SftH (a 3' to 5' helicase (36)). While Pif1 and SftH  
358 exhibited unidirectional helicase activity as expected, ComM unwound all of the substrates  
359 tested (**Fig. 4C**). Taken together, these data suggest that ComM is an ATP-dependent  
360 bidirectional helicase. Bidirectional activity of a single motor protein like ComM, while  
361 uncommon, is not unprecedented (37-39).

362  
363 *ComM exhibits branch migration in vitro*

364 While our data above clearly indicate that ComM is a hexameric helicase, not all helicases can  
365 promote branch migration. To more formally test whether ComM can promote branch  
366 migration, we performed *in vitro* branch migration assays using short 3-stranded substrates  
367 that more closely resemble the junctions of the D-loop that form during natural transformation  
368 (**Fig. S6A and S6B**)(40). These substrates contained a small region of heterology (indicated by  
369 the grey box), which prevents spontaneous branch migration as previously described (40).  
370 Using these substrates, we observed resolution of both the 5' to 3' and 3' to 5' substrates (**Fig.**  
371 **S6C and D**), which is consistent with the bidirectional helicase activity of ComM. This activity  
372 was inhibited when ComM was incubated with AMP-PNP, a nonhydrolyzable analog of ATP (**Fig.**  
373 **S6C and D**). And no activity was observed with ComM<sup>K224A</sup> even if incubated with ATP (**Fig. S6C**  
374 **and D**). Thus, the branch migration activity observed is ATPase-dependent. It is formally  
375 possible that resolution of these short 3-stranded products was the result of only helicase  
376 activity (via the sequential removal of the unlabeled strand followed by the labeled strand or by

377 unwinding of just the labeled strand). To address this, we also performed helicase assays using  
378 forked substrates that are derived from the oligos used to make the three-stranded branch  
379 migration substrates. This analysis indicated that ComM helicase activity on the forked  
380 substrates was markedly less efficient than its activity on the 3-stranded substrates (compare  
381 **Fig. S6C-D to S6E-F**), which suggests that the activity observed on the 3-stranded substrates is  
382 the result of *bona fide* branch migration and not simply helicase activity. The forked substrates  
383 used in this assay have 60 bp of annealed sequence (**Fig. S6E-F**), while the substrates previously  
384 used to test helicase activity only had 20 bp of annealed sequence (**Fig. 4A**). Thus, reduced  
385 activity on the forked DNA substrates in this assay is likely attributed to poor processivity for  
386 ComM helicase activity.

387  
388 While the short 3-stranded substrates used above suggest that ComM possesses branch  
389 migration activity, we further tested 3-stranded branch migration using long DNA substrates.  
390 Long 3-stranded substrates were generated by RecA-mediated strand exchange between  
391 circular single-stranded (CSS) and linear double-stranded (LDS)  $\phi$ X174 DNA (23,41). Strand  
392 exchange reactions were allowed to proceed until the majority of the LDS was reacted with the  
393 CSS to form intermediates (INT = joint molecules that have not completed strand exchange) or  
394 nicked product (NP = the product formed upon complete strand exchange). Reactions were  
395 then deproteinated, and the resulting DNA was used to assess resolution of the long 3-stranded  
396 INT via branch migration (23,41). We found that ComM could efficiently drive the reaction in  
397 both directions, resolving the INT structures into both NP and LDS (**Fig. 5**), while reactions  
398 where ComM<sup>K224A</sup> was added showed no activity. These results are consistent with ComM  
399 promoting branch migration of these long DNA substrates. Together, these results indicate that  
400 ComM exhibits branch migration on 3-stranded junctions *in vitro* on substrates that are likely  
401 similar to the structures formed during natural transformation *in vivo*.

402

#### 403 ComM is broadly conserved

404 Next, we assessed how broadly conserved ComM was among bacterial species. Homologs of  
405 ComM are found almost ubiquitously among Gram-negative species, including all known Gram-

406 negative naturally competent microbes (**Fig. 6** and **Fig. S7**). Among this group, only select  
407 species lacked a ComM homolog, suggesting that loss of ComM occurred relatively recently  
408 (**Fig. 6** and **Fig. S7**). By contrast, we see a pervasive lack of ComM homologs among species  
409 within the Bacilli and Mollicutes, (**Fig. 6** and **Fig. S7**), suggesting that ComM may have been lost  
410 in a common ancestor for these two Classes. Interestingly, all known naturally competent  
411 Gram-positive species fall within the Bacilli group, indicating that branch migration during  
412 natural transformation must occur via a ComM-independent mechanism in these microbes.

413

#### 414 *ComM promotes branch migration in Acinetobacter baylyi*

415 Because ComM is broadly conserved among Gram-negative naturally competent microbes,  
416 next, we tested its role during natural transformation in the model competent species *A. baylyi*  
417 ADP1. As in *V. cholerae*, a *comM* mutant of *A. baylyi* displayed greatly reduced rates of natural  
418 transformation when using linear tDNA (**Fig. 7A, left**). Also, this mutant displayed reduced  
419 comigration of linked genetic markers, consistent with *comM* playing a role in branch migration  
420 (**Fig. 7A, right**). Additionally, we observed that ComM is required for integration of tDNA  
421 containing larger regions of heterologous sequence (**Fig. 7B**). These data are consistent with  
422 what was observed in *V. cholerae* (**Fig. 2**) and suggests that ComM is a conserved branch  
423 migration factor important for natural transformation in diverse Gram-negative bacterial  
424 species.

425

#### 426 *RadA is not required for natural transformation in V. cholerae.*

427 While ComM is broadly conserved, it is absent in all of the known Gram-positive naturally  
428 competent species (**Fig. 6**). In the Gram-positive *Streptococcus pneumoniae*, mutants of *radA*  
429 (also known as *sms*) display reduced rates of natural transformation but are not affected at the  
430 level of tDNA uptake, similar to what is observed for *V. cholerae comM* mutants in this study  
431 (42) and in *H. influenzae* (9). Similar results are also seen in *radA* mutants in *Bacillus subtilis*  
432 (43). *E. coli* RadA has recently been shown to promote branch migration during RecA-mediated  
433 strand exchange (23). Also, it was very recently demonstrated that RadA is a hexameric helicase  
434 that promotes bidirectional D-loop extension during natural transformation in *S. pneumoniae*

435 (38). Interestingly, *radA* is broadly conserved and both *V. cholerae* and *A. baylyi* contain *radA*  
436 homologs (VC2343 and ACIAD2664, respectively). RadA, however, is not required for natural  
437 transformation in *V. cholerae* (**Fig. S8**). Also, preliminary Tn-seq data from our lab indicates that  
438 RadA is not important for natural transformation in *A. baylyi*. Thus, it is tempting to speculate  
439 that in Gram-positive competent species, RadA carries out the same function that ComM plays  
440 during natural transformation in Gram-negative species.

441

#### 442 *ComM is not required for DNA repair*

443 ComM homologs are also found among diverse non-competent species (**Fig. 6**). Moreover,  
444 many bacterial helicases are implicated in promoting branch migration during other types of  
445 homologous recombination, including during DNA repair. So next, we wanted to determine if  
446 ComM also plays a role in DNA repair independent of its role during natural transformation.  
447 ComM is poorly expressed in the absence of competence induction in *V. cholerae* (**Fig. S2**).  
448 Thus, to test the role of ComM in DNA damage, we tested survival of  $P_{tac}\text{-}tfoX$  and  $P_{tac}\text{-}tfoX$   
449  $\Delta comM$  strains under competence inducing conditions (i.e. ectopic expression of TfoX). A WT  
450 strain and a *recA* mutant were also included in these assays as controls. DNA damage was  
451 tested using methyl methanesulfonate (MMS - methylates DNA / stalls replication forks) and  
452 mitomycin C (MMC – alkylates DNA / generates interstrand DNA crosslinks)(44,45). As  
453 expected, the *recA* mutant was more sensitive to these treatments compared to the WT,  
454 consistent with a critical role for homologous recombination in DNA repair (**Fig. S9**) (46,47). The  
455  $P_{tac}\text{-}tfoX \Delta comM$  mutant, however, was as resistant to these DNA damaging agents as the  $P_{tac}\text{-}$   
456  $tfoX$  strain, indicating that this branch migration factor either does not play a role during DNA  
457 repair or that the activity of this protein is redundant with other branch migration factors in the  
458 context of repair (**Fig. S9**). Furthermore, induction of competence (via ectopic expression of  
459 TfoX) showed little to no difference in DNA damage repair compared to the WT, indicating that  
460 natural competence plays a limited role in DNA repair in *V. cholerae* under the condition tested  
461 (**Fig. S9**).

462

## 463 **DISCUSSION**



464 Natural transformation is an important mechanism of horizontal gene transfer in bacterial  
465 species. It is dependent upon activation of bacterial competence or the ability to bind and take  
466 up exogenous DNA. Altogether, our *in vivo* and *in vitro* data elucidate a role for ComM as a  
467 helicase / branch migration factor that promotes the integration of tDNA during natural  
468 transformation. In our model, integration is initiated by RecA-mediated strand invasion and  
469 formation of a D-loop that generates a three-stranded intermediate structure (**Fig. 8**). Through  
470 its bidirectional helicase and/or branch migration activity, ComM then likely promotes  
471 expansion of the D-loop, which enhances the integration of tDNA into the genome (**Fig. 8**).  
472 Following branch migration, the junctions are resolved to mediate stable integration of tDNA by  
473 an unresolved mechanism.

474  
475 Our data suggest that ComM is important for the incorporation of heterologous sequences. The  
476 main drivers for evolution and maintenance of natural transformation in bacterial species are  
477 heavily debated. One model suggests that this process is largely for enhancing genetic diversity,  
478 while another hypothesis is that natural transformation evolved as a mechanism for acquisition  
479 of DNA as a nutrient (48,49). These processes are not mutually exclusive. Because ComM  
480 affects only the integration of heterologous tDNA (and not its uptake), however, the activity of  
481 this protein supports a role for natural transformation in adaptation and evolution through the  
482 acquisition of novel genetic material. Other competence genes that are involved specifically in  
483 homologous recombination (e.g., *dprA*) also support this hypothesis.

484  
485 Our *in vitro* data suggest that ComM forms a hexameric ring structure in its active state similar  
486 to that of eukaryotic MCM2-7 and bacterial DnaB (31,50). Our 3D reconstruction reveals a  
487 three-tiered barrel-like complex with a  $\sim 26\text{-\AA}$  pore and  $\sim 18\text{-\AA}$  pore on the top and bottom,  
488 respectively. We propose that ComM either forms around, or is loaded onto the displaced  
489 single strand of the native genomic DNA and acts as a wedge to dissociate these strands.  
490 Alternatively, dsDNA may enter the  $26\text{-\AA}$  pore, be unwound in the central channel of the  
491 complex with single strands being extruded through the side channels that are evident between  
492 the tiers of the barrel structure. Such side channels are not uncommon among hexameric AAA+

493 helicases (e.g., SV40 T-antigen (51,52) and the archaeal MCM (28,53)) and have been  
494 hypothesized to be exit channels for extruded ssDNA. The pore sizes observed in our  
495 reconstruction appear to be consistent with those found in other ring helicases, however, it has  
496 been shown that the size of the opening and channel can change depending on the nucleotide  
497 bound (ATP vs. ADP) (51,54). Future work will focus on characterizing the ComM structure  
498 bound to ADP and AMP-PNP, which may help inform the structural changes associated with the  
499 catalytic cycle of this hexameric helicase.

500

501 Our phylogenetic analysis indicates that ComM is broadly conserved in bacterial species, and is  
502 largely, only excluded from the Bacilli and Mollicutes. There is also, however, evidence for  
503 isolated examples for ComM loss in species that fall outside of these two groups, which  
504 suggests that these have occurred relatively recently. Some of these represent obligate  
505 intracellular pathogens or endosymbionts, which commonly contain highly reduced genomes  
506 (e.g. *Buchnera* and *Chlamydia*) (55,56). Another example of recent ComM loss is among  
507 *Prochlorococcus* species, which are related to other naturally competent cyanobacteria (e.g.  
508 *Synechococcus* and *Synechocystis spp.*). Interestingly, we found that *Prochlorococcus* lacked  
509 many of the genes required for natural transformation (e.g. *dprA*, *comEA*, *comEC*, etc.) (57),  
510 indicating that competence may have been lost in this lineage of cyanobacteria. Another  
511 notable example of ComM loss is in *Acinetobacter baumannii*, which is an opportunistic  
512 pathogen that is closely related to *A. baylyi*. Many strains of *A. baumannii*, including the one  
513 analyzed here (ATCC 17978), contain an AbaR-type genomic island integrated into *comM*  
514 (58,59). Strains that contain this horizontally transferred genomic island display low rates of  
515 natural transformation while those that lack it display higher rates of natural transformation  
516 (60), indicating that AbaR island-dependent inactivation of ComM may inhibit this mechanism  
517 of horizontal gene transfer in *A. baumannii*. This represents another example in a growing list of  
518 horizontally acquired genomic elements that inhibit natural transformation (61-63). Our  
519 phylogenetic analysis also indicates that ComM is highly conserved among non-competent  
520 bacterial species. This suggests that ComM may have a function outside of natural  
521 transformation. Alternatively, it is possible that many of these species are capable of natural

522 transformation, however, the conditions required for competence induction have not yet been  
523 identified. Indeed, the inducing cue for natural transformation in *V. cholerae* was only  
524 discovered in 2006 (2).

525  
526 Our data suggest that branch migration in Gram-positive and Gram-negative species has  
527 diverged in their dependence on distinct factors (RadA and ComM, respectively). The tract  
528 length of DNA recombined into *S. pneumoniae* during natural transformation is ~2.5 kb on  
529 average (64). In *H. influenzae*, the mean recombination tract length is ~14 kb (65). Thus,  
530 compared to RadA-dependent branch migration in Gram-positive species, ComM may facilitate  
531 the integration of more tDNA in Gram-negative species. Other proteins that impact DNA  
532 integration during natural transformation, however, may confound this overly simplified  
533 comparison.

534  
535 ComM is not essential for natural transformation because transformants are still observed in a  
536 *comM* mutant. This suggests that other proteins may be involved in promoting the integration  
537 of tDNA in the absence of this branch migration factor. Also, our data suggest that these  
538 alternative branch migration factors are less efficient at incorporating tDNA with sequence  
539 heterology compared to ComM in both *V. cholerae* and *A. baylyi*. This role could be carried out  
540 by another helicase. Candidates include RuvAB, RecG, and PriA, which have all previously been  
541 implicated in branch migration (32,33,66). In fact, the primasome helicase PriA is essential for  
542 natural transformation in *Neisseria gonorrhoeae*. This may be due to a role in branch migration,  
543 however, PriA is also essential for restarting stalled replication forks and *priA* mutants have a  
544 severe growth defect (67). Also, it has been proposed that PriA helicase activity may facilitate  
545 the uptake of tDNA through the inner membrane (68). A *recG* homologue in *Streptococcus*  
546 *pneumoniae* (*mmsA*) was shown to have a mild effect on transformation when deleted (69).  
547 RecG reverses stalled replication forks and promotes branch migration opposite to the direction  
548 of RecA-mediated strand exchange in *E. coli* (70,71). Also, RecG acts on three-strand  
549 intermediates *in vitro*, which could give credence to involvement in natural transformation  
550 where such a structure is formed (41). Because RecG works counter to the direction of RecA-

551 mediated strand exchange, however, it is currently unclear how RecG may play a role in natural  
552 transformation in the presence of ComM. Another possibility is that RecA, which has inherent  
553 ATP-dependent unidirectional branch migration activity (72,73), could promote branch  
554 migration independent of other canonical branch migration factors. Future work will focus on  
555 identifying genetically interacting partners of ComM to uncover the role of additional factors  
556 required for efficient integration of tDNA during natural transformation.

557

558 In addition to a AAA+ ATPase domain, ComM also contains two magnesium (Mg) chelatase  
559 domains. Mg chelatase domain-containing proteins have only previously been implicated in  
560 inserting Mg into protoporphyrin rings in photosynthetic organisms (74). While it is currently  
561 unclear how these domains participate in ComM function, to our knowledge, this study is the  
562 first to indicate a function for a Mg-chelatase domain-containing protein in a non-  
563 photosynthetic organism.

564

565 In conclusion, the results from this study strongly support that ComM enhances natural  
566 transformation by promoting ATP-dependent bidirectional helicase activity and/or branch  
567 migration activity, which allows for the efficient integration of heterologous tDNA.  
568 Furthermore, our data in *V. cholerae* and *A. baylyi* as well as previous work from *H. influenzae*  
569 indicate that this branch migration factor is a broadly conserved mechanism for integration of  
570 tDNA in diverse naturally transformable Gram-negative species.

571

## 572 **ACKNOWLEDGEMENTS**

573 This work was supported by US National Institutes of Health Grant AI118863 to A.B.D., an  
574 Indiana University Collaborative Research Grant to M.L.B., an American Cancer Society  
575 Research Scholar grant (RSG-16-180-01-DMC) to M.L.B., startup funds from the Indiana  
576 University College of Arts and Sciences to ABD, and DTK was supported by NIH grant R35  
577 GM122556 to Yves Brun.

578

## 579 **REFERENCES**

- 580 1. Seitz, P. and Blokesch, M. (2013) Cues and regulatory pathways involved in natural  
581 competence and transformation in pathogenic and environmental Gram-negative  
582 bacteria. *FEMS Microbiol Rev*, **37**, 336-363.
- 583 2. Meibom, K.L., Blokesch, M., Dolganov, N.A., Wu, C.Y. and Schoolnik, G.K. (2005) Chitin  
584 induces natural competence in *Vibrio cholerae*. *Science*, **310**, 1824-1827.
- 585 3. Dalia, A.B., Lazinski, D.W. and Camilli, A. (2014) Identification of a membrane-bound  
586 transcriptional regulator that links chitin and natural competence in *Vibrio*  
587 *cholerae*. *MBio*, **5**, e01028-01013.
- 588 4. Yamamoto, S., Mitobe, J., Ishikawa, T., Wai, S.N., Ohnishi, M., Watanabe, H. and  
589 Izumiya, H. (2014) Regulation of natural competence by the orphan two-component  
590 system sensor kinase ChiS involves a non-canonical transmembrane regulator in  
591 *Vibrio cholerae*. *Mol Microbiol*, **91**, 326-347.
- 592 5. Lo Scudato, M. and Blokesch, M. (2012) The regulatory network of natural  
593 competence and transformation of *Vibrio cholerae*. *PLoS Genet*, **8**, e1002778.
- 594 6. Lo Scudato, M. and Blokesch, M. (2013) A transcriptional regulator linking quorum  
595 sensing and chitin induction to render *Vibrio cholerae* naturally transformable.  
596 *Nucleic Acids Res*, **41**, 3644-3658.
- 597 7. Metzgar, D., Bacher, J.M., Pezo, V., Reader, J., Doring, V., Schimmel, P., Marliere, P. and  
598 de Crecy-Lagard, V. (2004) *Acinetobacter* sp. ADP1: an ideal model organism for  
599 genetic analysis and genome engineering. *Nucleic Acids Res*, **32**, 5780-5790.
- 600 8. Lorenz, M.G. and Wackernagel, W. (1994) Bacterial gene transfer by natural genetic  
601 transformation in the environment. *Microbiol Rev*, **58**, 563-602.
- 602 9. Gwinn, M.L., Ramanathan, R., Smith, H.O. and Tomb, J.F. (1998) A new  
603 transformation-deficient mutant of *Haemophilus influenzae* Rd with normal DNA  
604 uptake. *J Bacteriol*, **180**, 746-748.
- 605 10. Miller, V.L., DiRita, V.J. and Mekalanos, J.J. (1989) Identification of *toxS*, a regulatory  
606 gene whose product enhances *toxR*-mediated activation of the cholera toxin  
607 promoter. *J Bacteriol*, **171**, 1288-1293.
- 608 11. Juni, E. and Janik, A. (1969) Transformation of *Acinetobacter calco-aceticus*  
609 (*Bacterium anitratum*). *J Bacteriol*, **98**, 281-288.

- 610 12. Dalia, A.B., Lazinski, D.W. and Camilli, A. (2013) Characterization of  
611 undermethylated sites in *Vibrio cholerae*. *J Bacteriol*, **195**, 2389-2399.
- 612 13. Dalia, A.B., McDonough, E. and Camilli, A. (2014) Multiplex genome editing by  
613 natural transformation. *Proc Natl Acad Sci U S A*, **111**, 8937-8942.
- 614 14. Dalia, A.B. (2016) RpoS is required for natural transformation of *Vibrio cholerae*  
615 through regulation of chitinases. *Environ Microbiol*, **18**, 3758-3767.
- 616 15. Studier, F.W. (2005) Protein production by auto-induction in high density shaking  
617 cultures. *Protein Expr Purif*, **41**, 207-234.
- 618 16. Wittig, I., Braun, H.P. and Schagger, H. (2006) Blue native PAGE. *Nat Protoc*, **1**, 418-  
619 428.
- 620 17. Wu, M. and Eisen, J.A. (2008) A simple, fast, and accurate method of phylogenomic  
621 inference. *Genome Biol*, **9**, R151.
- 622 18. Edgar, R.C. (2004) MUSCLE: multiple sequence alignment with high accuracy and  
623 high throughput. *Nucleic Acids Res*, **32**, 1792-1797.
- 624 19. Price, M.N., Dehal, P.S. and Arkin, A.P. (2010) FastTree 2--approximately maximum-  
625 likelihood trees for large alignments. *PLoS One*, **5**, e9490.
- 626 20. Darling, A.E., Jospin, G., Lowe, E., Matsen, F.A.t., Bik, H.M. and Eisen, J.A. (2014)  
627 PhyloSift: phylogenetic analysis of genomes and metagenomes. *PeerJ*, **2**, e243.
- 628 21. Stamatakis, A. (2014) RAxML version 8: a tool for phylogenetic analysis and post-  
629 analysis of large phylogenies. *Bioinformatics*, **30**, 1312-1313.
- 630 22. Le, S.Q. and Gascuel, O. (2008) An improved general amino acid replacement matrix.  
631 *Molecular biology and evolution*, **25**, 1307-1320.
- 632 23. Cooper, D.L. and Lovett, S.T. (2016) Recombinational branch migration by the  
633 RadA/Sms paralog of RecA in *Escherichia coli*. *eLife*, **5**.
- 634 24. Mortier-Barriere, I., Velten, M., Dupaigne, P., Mirouze, N., Pietrement, O., McGovern,  
635 S., Fichant, G., Martin, B., Noirot, P., Le Cam, E. *et al.* (2007) A key presynaptic role in  
636 transformation for a widespread bacterial protein: DprA conveys incoming ssDNA  
637 to RecA. *Cell*, **130**, 824-836.
- 638 25. Suckow, G., Seitz, P. and Blokesch, M. (2011) Quorum sensing contributes to natural  
639 transformation of *Vibrio cholerae* in a species-specific manner. *J Bacteriol*, **193**,  
640 4914-4924.

- 641 26. Hanson, P.I. and Whiteheart, S.W. (2005) AAA+ proteins: have engine, will work. *Nat*  
642 *Rev Mol Cell Biol*, **6**, 519-529.
- 643 27. Kelley, L.A., Mezulis, S., Yates, C.M., Wass, M.N. and Sternberg, M.J. (2015) The  
644 Phyre2 web portal for protein modeling, prediction and analysis. *Nat Protoc*, **10**,  
645 845-858.
- 646 28. Brewster, A.S., Wang, G., Yu, X., Greenleaf, W.B., Carazo, J.M., Tjajadi, M., Klein, M.G.  
647 and Chen, X.S. (2008) Crystal structure of a near-full-length archaeal MCM:  
648 functional insights for an AAA+ hexameric helicase. *Proc Natl Acad Sci U S A*, **105**,  
649 20191-20196.
- 650 29. Kaplan, D.L., Davey, M.J. and O'Donnell, M. (2003) Mcm4,6,7 uses a "pump in ring"  
651 mechanism to unwind DNA by steric exclusion and actively translocate along a  
652 duplex. *J Biol Chem*, **278**, 49171-49182.
- 653 30. Borgeaud, S., Metzger, L.C., Scignari, T. and Blokesch, M. (2015) The type VI  
654 secretion system of *Vibrio cholerae* fosters horizontal gene transfer. *Science*, **347**,  
655 63-67.
- 656 31. Bochman, M.L. and Schwacha, A. (2009) The Mcm complex: unwinding the  
657 mechanism of a replicative helicase. *Microbiol Mol Biol Rev*, **73**, 652-683.
- 658 32. Lloyd, R.G. and Sharples, G.J. (1993) Processing of recombination intermediates by  
659 the RecG and RuvAB proteins of *Escherichia coli*. *Nucleic Acids Res*, **21**, 1719-1725.
- 660 33. West, S.C. (1997) Processing of recombination intermediates by the RuvABC  
661 proteins. *Annu Rev Genet*, **31**, 213-244.
- 662 34. Paeschke, K., Bochman, M.L., Garcia, P.D., Cejka, P., Friedman, K.L., Kowalczykowski,  
663 S.C. and Zakian, V.A. (2013) Pif1 family helicases suppress genome instability at G-  
664 quadruplex motifs. *Nature*, **497**, 458-462.
- 665 35. Kaplan, D.L. and O'Donnell, M. (2002) DnaB drives DNA branch migration and  
666 dislodges proteins while encircling two DNA strands. *Mol Cell*, **10**, 647-657.
- 667 36. Yakovleva, L. and Shuman, S. (2012) *Mycobacterium smegmatis* SftH exemplifies a  
668 distinctive clade of superfamily II DNA-dependent ATPases with 3' to 5' translocase  
669 and helicase activities. *Nucleic Acids Res*, **40**, 7465-7475.

- 670 37. Fallesen, T., Roostalu, J., Duellberg, C., Pruessner, G. and Surrey, T. (2017) Ensembles  
671 of Bidirectional Kinesin Cin8 Produce Additive Forces in Both Directions of  
672 Movement. *Biophys J*, **113**, 2055-2067.
- 673 38. Marie, L., Rapisarda, C., Morales, V., Berge, M., Perry, T., Soulet, A.L., Gruget, C.,  
674 Remaut, H., Fronzes, R. and Polard, P. (2017) Bacterial RadA is a DnaB-type helicase  
675 interacting with RecA to promote bidirectional D-loop extension. *Nat Commun*, **8**,  
676 15638.
- 677 39. Rozen, F., Edery, I., Meerovitch, K., Dever, T.E., Merrick, W.C. and Sonenberg, N.  
678 (1990) Bidirectional RNA helicase activity of eucaryotic translation initiation factors  
679 4A and 4F. *Mol Cell Biol*, **10**, 1134-1144.
- 680 40. Bugreev, D.V., Brosh, R.M., Jr. and Mazin, A.V. (2008) RECQ1 possesses DNA branch  
681 migration activity. *J Biol Chem*, **283**, 20231-20242.
- 682 41. Whitby, M.C. and Lloyd, R.G. (1995) Branch migration of three-strand recombination  
683 intermediates by RecG, a possible pathway for securing exchanges initiated by 3'-  
684 tailed duplex DNA. *EMBO J*, **14**, 3302-3310.
- 685 42. Burghout, P., Bootsma, H.J., Kloosterman, T.G., Bijlsma, J.J., de Jongh, C.E., Kuipers,  
686 O.P. and Hermans, P.W. (2007) Search for genes essential for pneumococcal  
687 transformation: the RADA DNA repair protein plays a role in genomic  
688 recombination of donor DNA. *J Bacteriol*, **189**, 6540-6550.
- 689 43. Carrasco, B., Fernandez, S., Asai, K., Ogasawara, N. and Alonso, J.C. (2002) Effect of  
690 the recU suppressors sms and subA on DNA repair and homologous recombination  
691 in *Bacillus subtilis*. *Mol Genet Genomics*, **266**, 899-906.
- 692 44. Weng, M.W., Zheng, Y., Jasti, V.P., Champeil, E., Tomasz, M., Wang, Y., Basu, A.K. and  
693 Tang, M.S. (2010) Repair of mitomycin C mono- and interstrand cross-linked DNA  
694 adducts by UvrABC: a new model. *Nucleic Acids Res*, **38**, 6976-6984.
- 695 45. Lundin, C., North, M., Erixon, K., Walters, K., Jenssen, D., Goldman, A.S. and Helleday,  
696 T. (2005) Methyl methanesulfonate (MMS) produces heat-labile DNA damage but no  
697 detectable in vivo DNA double-strand breaks. *Nucleic Acids Res*, **33**, 3799-3811.
- 698 46. Goranov, A.I., Kuester-Schoeck, E., Wang, J.D. and Grossman, A.D. (2006)  
699 Characterization of the global transcriptional responses to different types of DNA



- 700 damage and disruption of replication in *Bacillus subtilis*. *J Bacteriol*, **188**, 5595-  
701 5605.
- 702 47. Better, M. and Helinski, D.R. (1983) Isolation and characterization of the *recA* gene  
703 of *Rhizobium meliloti*. *J Bacteriol*, **155**, 311-316.
- 704 48. Michod, R.E., Wojciechowski, M.F. and Hoelzer, M.A. (1988) DNA repair and the  
705 evolution of transformation in the bacterium *Bacillus subtilis*. *Genetics*, **118**, 31-39.
- 706 49. Redfield, R.J. (1993) Genes for breakfast: the have-your-cake-and-eat-it-too of  
707 bacterial transformation. *J Hered*, **84**, 400-404.
- 708 50. San Martin, M.C., Stamford, N.P., Dammerova, N., Dixon, N.E. and Carazo, J.M. (1995)  
709 A structural model for the *Escherichia coli* DnaB helicase based on electron  
710 microscopy data. *J Struct Biol*, **114**, 167-176.
- 711 51. Gai, D., Zhao, R., Li, D., Finkielstein, C.V. and Chen, X.S. (2004) Mechanisms of  
712 conformational change for a replicative hexameric helicase of SV40 large tumor  
713 antigen. *Cell*, **119**, 47-60.
- 714 52. Li, D., Zhao, R., Lilyestrom, W., Gai, D., Zhang, R., DeCaprio, J.A., Fanning, E.,  
715 Jochimiak, A., Szakonyi, G. and Chen, X.S. (2003) Structure of the replicative helicase  
716 of the oncoprotein SV40 large tumour antigen. *Nature*, **423**, 512-518.
- 717 53. Costa, A., Pape, T., van Heel, M., Brick, P., Patwardhan, A. and Onesti, S. (2006)  
718 Structural basis of the *Methanothermobacter thermautotrophicus* MCM helicase  
719 activity. *Nucleic Acids Res*, **34**, 5829-5838.
- 720 54. Strycharska, M.S., Arias-Palomo, E., Lyubimov, A.Y., Erzberger, J.P., O'Shea, V.L.,  
721 Bustamante, C.J. and Berger, J.M. (2013) Nucleotide and partner-protein control of  
722 bacterial replicative helicase structure and function. *Mol Cell*, **52**, 844-854.
- 723 55. Shigenobu, S., Watanabe, H., Hattori, M., Sakaki, Y. and Ishikawa, H. (2000) Genome  
724 sequence of the endocellular bacterial symbiont of aphids *Buchnera* sp. APS. *Nature*,  
725 **407**, 81-86.
- 726 56. Stephens, R.S., Kalman, S., Lammel, C., Fan, J., Marathe, R., Aravind, L., Mitchell, W.,  
727 Olinger, L., Tatusov, R.L., Zhao, Q. *et al.* (1998) Genome sequence of an obligate  
728 intracellular pathogen of humans: *Chlamydia trachomatis*. *Science*, **282**, 754-759.
- 729 57. Rocap, G., Larimer, F.W., Lamerdin, J., Malfatti, S., Chain, P., Ahlgren, N.A., Arellano, A.,  
730 Coleman, M., Hauser, L., Hess, W.R. *et al.* (2003) Genome divergence in two

- 731 Prochlorococcus ecotypes reflects oceanic niche differentiation. *Nature*, **424**, 1042-  
732 1047.
- 733 58. Smith, M.G., Gianoulis, T.A., Pukatzki, S., Mekalanos, J.J., Ornston, L.N., Gerstein, M.  
734 and Snyder, M. (2007) New insights into *Acinetobacter baumannii* pathogenesis  
735 revealed by high-density pyrosequencing and transposon mutagenesis. *Genes Dev*,  
736 **21**, 601-614.
- 737 59. Ramirez, M.S., Vilacoba, E., Stietz, M.S., Merkier, A.K., JERIC, P., Limansky, A.S.,  
738 Marquez, C., Bello, H., Catalano, M. and Centron, D. (2013) Spreading of AbaR-type  
739 genomic islands in multidrug resistance *Acinetobacter baumannii* strains belonging  
740 to different clonal complexes. *Curr Microbiol*, **67**, 9-14.
- 741 60. Traglia, G.M., Chua, K., Centron, D., Tolmasky, M.E. and Ramirez, M.S. (2014) Whole-  
742 genome sequence analysis of the naturally competent *Acinetobacter baumannii*  
743 clinical isolate A118. *Genome Biol Evol*, **6**, 2235-2239.
- 744 61. Dalia, A.B., Seed, K.D., Calderwood, S.B. and Camilli, A. (2015) A globally distributed  
745 mobile genetic element inhibits natural transformation of *Vibrio cholerae*. *Proc Natl*  
746 *Acad Sci U S A*, **112**, 10485-10490.
- 747 62. Konkol, M.A., Blair, K.M. and Kearns, D.B. (2013) Plasmid-encoded ComI inhibits  
748 competence in the ancestral 3610 strain of *Bacillus subtilis*. *J Bacteriol*, **195**, 4085-  
749 4093.
- 750 63. Rabinovich, L., Sigal, N., Borovok, I., Nir-Paz, R. and Herskovits, A.A. (2012) Prophage  
751 excision activates *Listeria* competence genes that promote phagosomal escape and  
752 virulence. *Cell*, **150**, 792-802.
- 753 64. Croucher, N.J., Harris, S.R., Barquist, L., Parkhill, J. and Bentley, S.D. (2012) A high-  
754 resolution view of genome-wide pneumococcal transformation. *PLoS Pathog*, **8**,  
755 e1002745.
- 756 65. Mell, J.C., Shumilina, S., Hall, I.M. and Redfield, R.J. (2011) Transformation of natural  
757 genetic variation into *Haemophilus influenzae* genomes. *PLoS Pathog*, **7**, e1002151.
- 758 66. Al-Deib, A.A., Mahdi, A.A. and Lloyd, R.G. (1996) Modulation of recombination and  
759 DNA repair by the RecG and PriA helicases of *Escherichia coli* K-12. *J Bacteriol*, **178**,  
760 6782-6789.

- 761 67. Kline, K.A. and Seifert, H.S. (2005) Mutation of the *priA* gene of *Neisseria*  
762 gonorrhoeae affects DNA transformation and DNA repair. *J Bacteriol*, **187**, 5347-  
763 5355.
- 764 68. Kruger, N.J. and Stingl, K. (2011) Two steps away from novelty--principles of  
765 bacterial DNA uptake. *Mol Microbiol*, **80**, 860-867.
- 766 69. Martin, B., Sharples, G.J., Humbert, O., Lloyd, R.G. and Claverys, J.P. (1996) The *mmsA*  
767 locus of *Streptococcus pneumoniae* encodes a RecG-like protein involved in DNA  
768 repair and in three-strand recombination. *Mol Microbiol*, **19**, 1035-1045.
- 769 70. Whitby, M.C., Ryder, L. and Lloyd, R.G. (1993) Reverse branch migration of Holliday  
770 junctions by RecG protein: a new mechanism for resolution of intermediates in  
771 recombination and DNA repair. *Cell*, **75**, 341-350.
- 772 71. Azeroglu, B., Mawer, J.S., Cockram, C.A., White, M.A., Hasan, A.M., Filatenkova, M. and  
773 Leach, D.R. (2016) RecG Directs DNA Synthesis during Double-Strand Break Repair.  
774 *PLoS Genet*, **12**, e1005799.
- 775 72. Cox, M.M., Morrical, S.W. and Neuendorf, S.K. (1984) Unidirectional branch  
776 migration promoted by nucleoprotein filaments of RecA protein and DNA. *Cold*  
777 *Spring Harb Symp Quant Biol*, **49**, 525-533.
- 778 73. Cox, M.M. and Lehman, I.R. (1981) Directionality and polarity in *recA* protein-  
779 promoted branch migration. *Proc Natl Acad Sci U S A*, **78**, 6018-6022.
- 780 74. Papenbrock, J., Mock, H.P., Tanaka, R., Kruse, E. and Grimm, B. (2000) Role of  
781 magnesium chelatase activity in the early steps of the tetrapyrrole biosynthetic  
782 pathway. *Plant Physiol*, **122**, 1161-1169.

783

#### 784 **FIGURE LEGENDS**

785 **Fig. 1** – *ComM* is required for integration of DNA during natural transformation. (A) Chitin-  
786 dependent natural transformation assays in the indicated strains using a linear PCR product or a  
787 replicating plasmid as tDNA. (B) Chitin-independent transformation assays of the indicated  
788 strains with linear PCR product as tDNA. (C) Complementation of *comM* *in trans* tested in chitin-  
789 dependent transformation assays using a linear PCR product as tDNA. All data are shown as the

790 mean  $\pm$  SD and are the result of at least three independent biological replicates. \*\* =  $p < 0.01$ ,  
791 \*\*\* =  $p < 0.001$ , NS = not significant

792

793 **Fig. 2 – *ComM* promotes branch migration through heterologous sequences in vivo.** (A) Chitin-  
794 dependent transformation assay performed using tDNA that contained linked genetic markers  
795 separated by 820 bp or 245 bp. (B) Chitin-dependent transformation assay performed in Tm<sup>S</sup>  
796 strains (Tm<sup>R</sup> marker inactivated by a nonsense point mutation or 29-bp deletion) using tDNA  
797 that would revert the integrated marker to Tm<sup>R</sup>. All strains in A and B contained a mutation in  
798 *mutS* to prevent MMR activity. In schematics above bar graphs, X's denote possible crossover  
799 points for homologous recombination. All data are shown as the mean  $\pm$  SD and are the result  
800 of at least three independent biological replicates. \*\*\* =  $p < 0.001$

801

802 **Fig. 3 – *ComM* hexamerizes in the presence of ATP and ssDNA.** (A) Blue-native PAGE assay of  
803 purified ComM in the indicated conditions. (B) Negative stain EM of purified ComM under the  
804 indicated conditions. Representative ring-like densities observed in the presence of 5 mM ATP  
805 and 5  $\mu$ M ssDNA are indicated by black arrows. Scale bar = 50 nm. (C) A representative 2-D class  
806 average of the ring-like densities observed by negative stain EM reveals a hexameric complex.  
807 (D) 3-D reconstruction ( $\sim 13.8$  Å resolution) of the ring complex imposing C6 symmetry.

808

809 **Fig. 4 – *ComM* exhibits helicase activity in vitro.** (A) A representative forked substrate helicase  
810 assay with increasing concentrations of purified ComM. This forked substrate has 20 bp of  
811 annealed sequence and 25 bp tails. Concentrations of ComM used (in hexamer) were 0, 10, 25,  
812 37.5, 50, 75, 100, 150, 200, and 250 nM. Images were quantified and plotted as indicated. (B)  
813 Helicase assay using forked DNA substrate with the indicated purified protein (100 nM Pif1 and  
814 250 nM ComM / ComM<sup>K224A</sup> hexamer) in the presence of 5 mM ATP (Columns 1, 2, and 3) or  
815 ATP $\gamma$ S (Column 4). (C) Helicase assays using forked DNA substrates that accommodate enzymes  
816 of either directionality or that can only be unwound by 5' to 3' or 3' to 5' activity. Directional  
817 substrates contained one ssDNA tail that is inverted relative to the remainder of the strand  
818 (inverted portion indicated in gray on the schematic above bars), thus, preventing helicase

819 activity in one direction. Substrates were incubated with 100 nM purified ComM (hexamer), 10  
820 nM Pif1, or 50 nM SftH. All data are shown as the mean  $\pm$  SD and are the result of at least three  
821 independent replicates. \*\*\* =  $p < 0.001$ .

822  
823 **Fig 5** – *ComM* exhibits 3-stranded branch migration activity on long DNA substrates in vitro. **(A)**  
824 Schematic for RecA-mediated strand exchange between linear double stranded PhiX174 (LDS)  
825 and circular single-stranded PhiX174 (CSS), which results in the formation of intermediates (INT)  
826 that can be resolved to nicked product (NP) if strand exchange commences to completion.  
827 Strand exchange reactions were deproteinated prior to complete strand exchange, and the  
828 resulting DNA was used to assess branch migration-dependent resolution of intermediate  
829 structures (INT). **(B)** Representative gel where deproteinated intermediates were incubated  
830 with the proteins indicated. **(C)** Three independent replicates of the assay described in **B** were  
831 quantified, and the relative abundance of the INT, NP, and LDS are shown as the mean  $\pm$  SD.  
832

833 **Fig. 6** – *ComM* is broadly conserved. Estimated maximum likelihood phylogeny of diverse  
834 species based on a concatenated alignment of 36 conserved proteins identified from whole  
835 genome sequences. Species with an identified ComM homolog are highlighted in gray.  
836 Competent species are designated by a star next to the species name. Major taxa are labeled  
837 along their nodes. Pro: Proteobacteria (Greek letters indicate subdivisions); Bac: Bacilli; Mol:  
838 Mollicutes; Cya: Cyanobacteria; Arc: Archaea. Scale bar indicates distance.  
839

840 **Fig. 7** – *ComM* promotes branch migration in *Acinetobacter baylyi*. **(A)** Transformation assay of  
841 *A. baylyi* using a linear tDNA product with linked genetic markers. **(B)** Transformation assay  
842 performed in Spec<sup>S</sup> strains with tDNA that would revert the strain to Spec<sup>R</sup>. Integration of the  
843 marker would either repair a point mutation or delete 180 bp of genomic sequence. All strains  
844 in **A** and **B** contain *mutS* mutations to prevent MMR activity. In schematics above bar graphs,  
845 X's denote possible crossover points for homologous recombination. All data are shown as the  
846 mean  $\pm$  SD and are the result of at least three independent biological replicates. \*\*\* =  $p < 0.001$ .  
847

848 **Fig. 8** – *Proposed model for the role of ComM during natural transformation.* ComM is shown as  
849 a hexameric ring that promotes integration of tDNA via its bidirectional helicase and/or branch  
850 migration activity. This can support integration of tDNA with a heterologous region, which is  
851 indicated by a gray box.

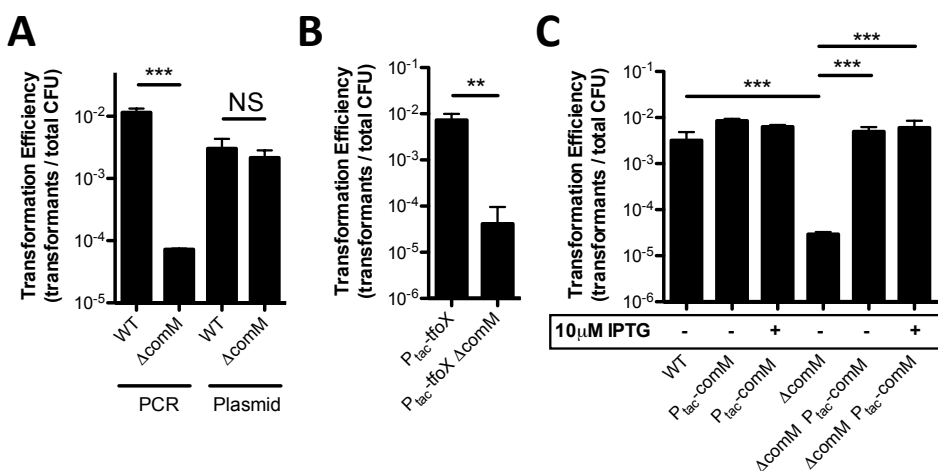

**Fig. 1 – *ComM* is required for integration of DNA during natural transformation. (A)** Chitin-dependent natural transformation assays in the indicated strains using a linear PCR product or a replicating plasmid as tDNA. **(B)** Chitin-independent transformation assays of the indicated strains with linear PCR product as tDNA. **(C)** Complementation of *comM* in trans tested in chitin-dependent transformation assays using a linear PCR product as tDNA. All data are shown as the mean  $\pm$  SD and are the result of at least three independent biological replicates. \*\* =  $p < 0.01$ , \*\*\* =  $p < 0.001$ , NS = not significant

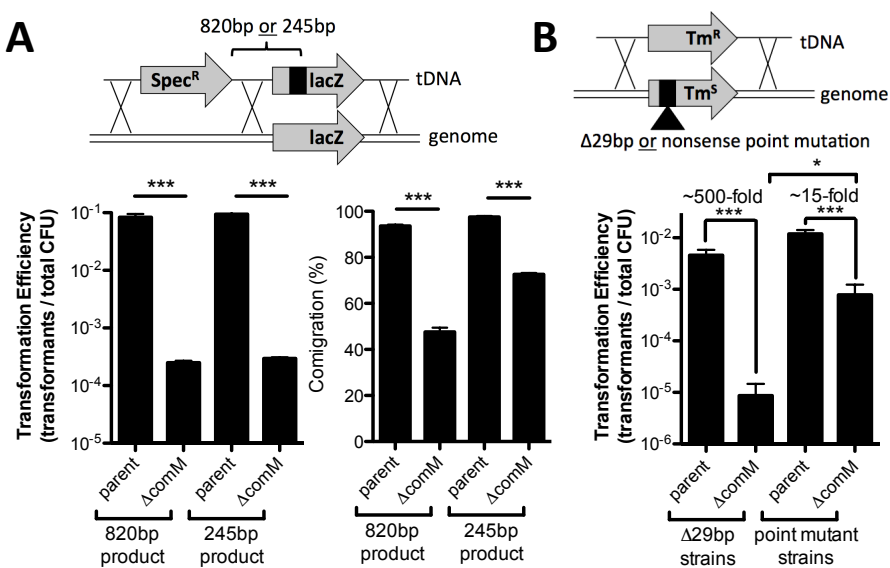

**Fig. 2 – *ComM* promotes branch migration through heterologous sequences in vivo. (A)** Chitin-dependent transformation assay performed using tDNA that contained linked genetic markers separated by 820 bp or 245 bp. **(B)** Chitin-dependent transformation assay performed in *Tm<sup>S</sup>* strains (*Tm<sup>R</sup>* marker inactivated by a nonsense point mutation or 29-bp deletion) using tDNA that would revert the integrated marker to *Tm<sup>R</sup>*. All strains in **A** and **B** contained a mutation in *mutS* to prevent MMR activity. In schematics above bar graphs, X's denote possible crossover points for homologous recombination. All data are shown as the mean ± SD and are the result of at least three independent biological replicates. \*\*\* =  $p < 0.001$



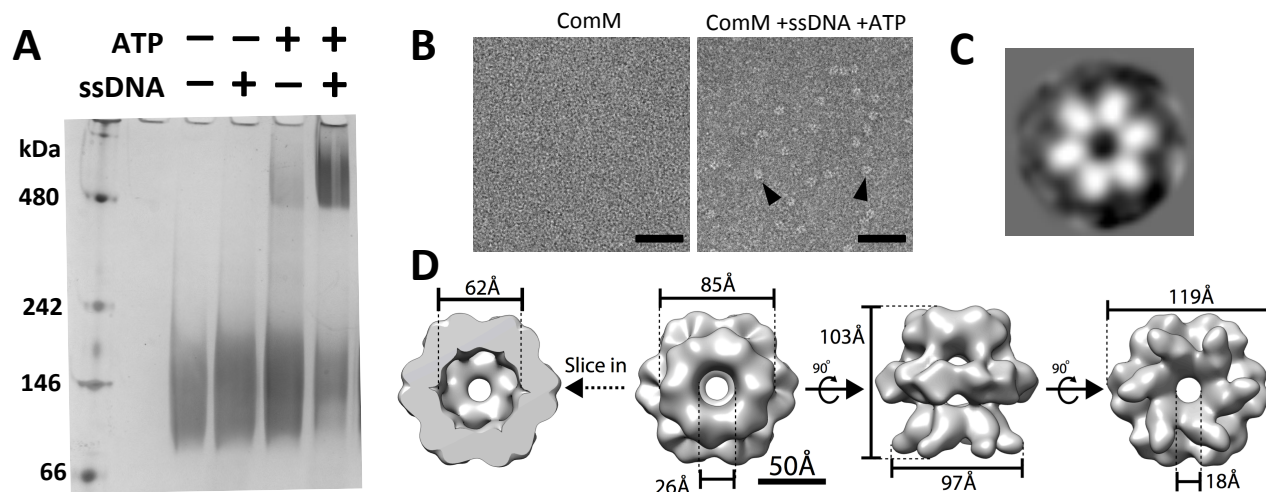

**Fig. 3 – ComM hexamerizes in the presence of ATP and ssDNA.** (A) Blue-native PAGE assay of purified ComM in the indicated conditions. (B) Negative stain EM of purified ComM under the indicated conditions. Representative ring-like densities observed in the presence of 5 mM ATP and 5  $\mu$ M ssDNA are indicated by black arrows. Scale bar = 50 nm. (C) A representative 2-D class average of the ring-like densities observed by negative stain EM reveals a hexameric complex. (D) 3-D reconstruction ( $\sim$ 13.8 Å resolution) of the ring complex imposing C6 symmetry.

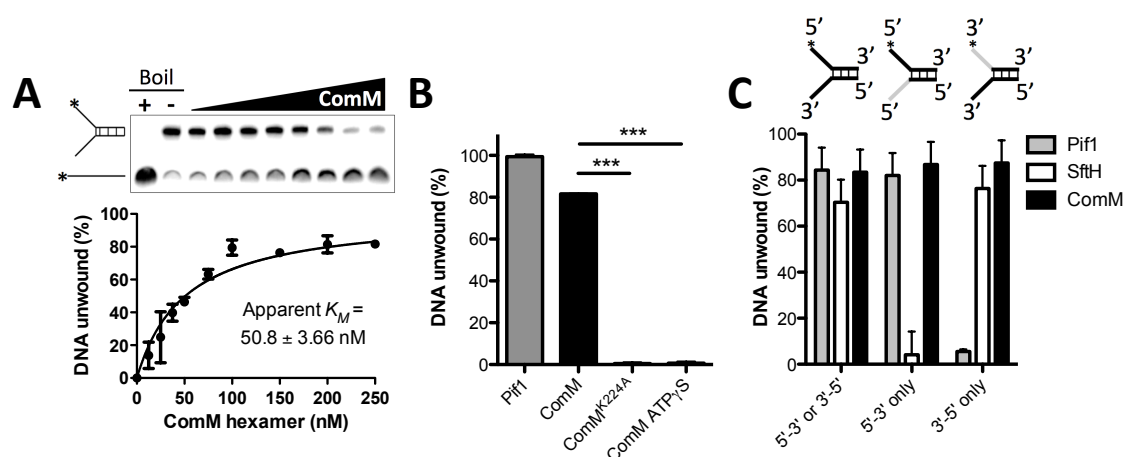

**Fig. 4 – ComM exhibits helicase activity in vitro.** (A) A representative forked substrate helicase assay with increasing concentrations of purified ComM. This forked substrate has 20 bp of annealed sequence and 25 bp tails. Concentrations of ComM used (in hexamer) were 0, 10, 25, 37.5, 50, 75, 100, 150, 200, and 250 nM. Images were quantified and plotted as indicated. (B) Helicase assay using forked DNA substrate with the indicated purified protein (100 nM Pif1 and 250 nM ComM / ComM<sup>K224A</sup> hexamer) in the presence of 5 mM ATP (Columns 1, 2, and 3) or ATP $\gamma$ S (Column 4). (C) Helicase assays using forked DNA substrates that accommodate enzymes of either directionality or that can only be unwound by 5' to 3' or 3' to 5' activity. Directional substrates contained one ssDNA tail that is inverted relative to the remainder of the strand (inverted portion indicated in gray on the schematic above bars), thus, preventing helicase activity in one direction. Substrates were incubated with 100 nM purified ComM (hexamer), 10 nM Pif1, or 50 nM SftH. All data are shown as the mean  $\pm$  SD and are the result of at least three independent replicates. \*\*\* =  $p < 0.001$ .

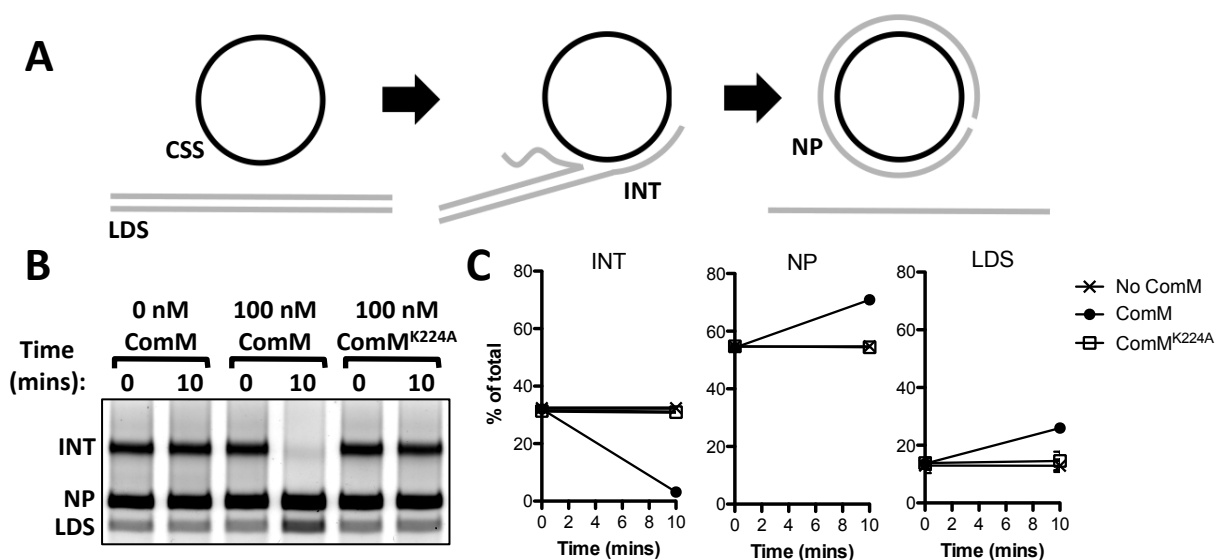

**Fig 5** – *ComM* exhibits 3-stranded branch migration activity on long DNA substrates in vitro. **(A)** Schematic for RecA-mediated strand exchange between linear double stranded PhiX174 (LDS) and circular single-stranded PhiX174 (CSS), which results in the formation of intermediates (INT) that can be resolved to nicked product (NP) if strand exchange commences to completion. Strand exchange reactions were deproteinated prior to complete strand exchange, and the resulting DNA was used to assess branch migration-dependent resolution of intermediate structures (INT). **(B)** Representative gel where deproteinated intermediates were incubated with the proteins indicated. **(C)** Three independent replicates of the assay described in **B** were quantified, and the relative abundance of the INT, NP, and LDS are shown as the mean  $\pm$  SD.

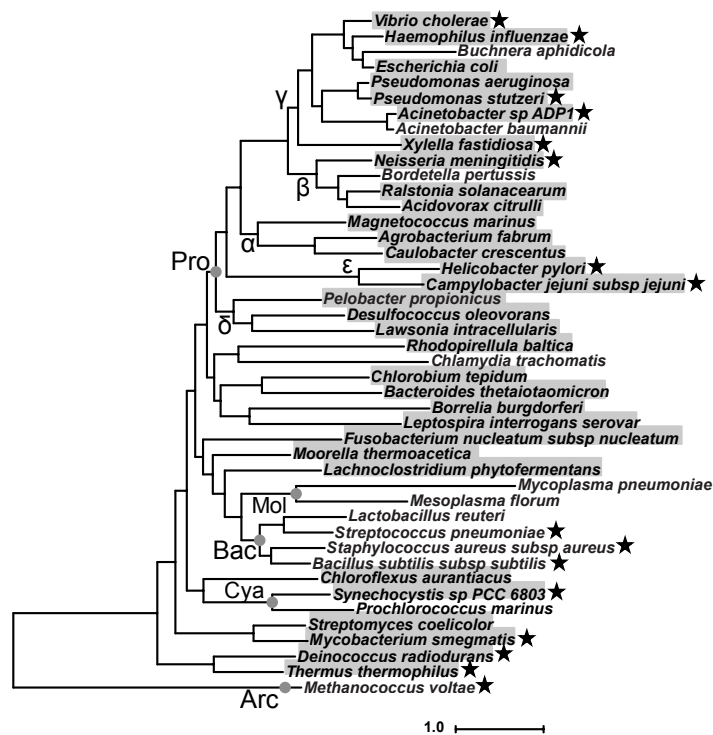

**Fig. 6** – *ComM* is broadly conserved. Estimated maximum likelihood phylogeny of diverse species based on a concatenated alignment of 36 conserved proteins identified from whole genome sequences. Species with an identified ComM homolog are highlighted in gray. Competent species are designated by a star next to the species name. Major taxa are labeled along their nodes. Pro: Proteobacteria (Greek letters indicate subdivisions); Bac: Bacilli; Mol: Mollicutes; Cya: Cyanobacteria; Arc: Archaea. Scale bar indicates distance.

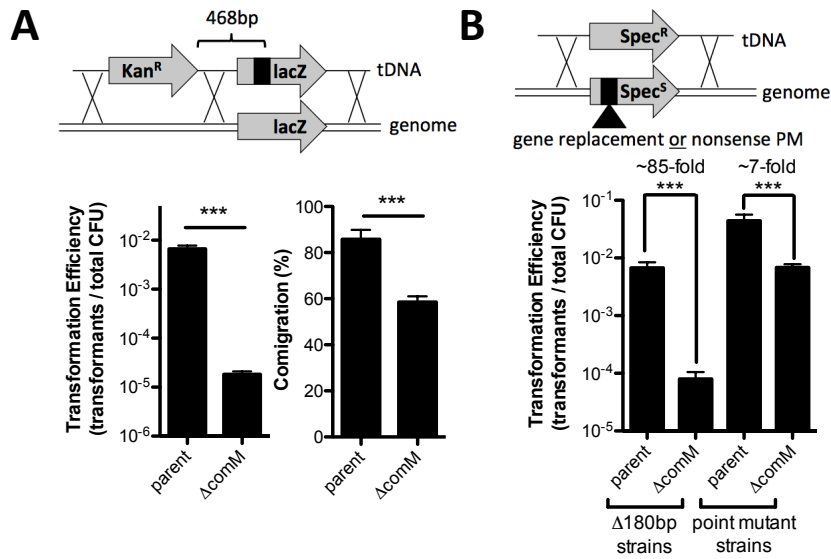

**Fig. 7 – *ComM* promotes branch migration in *Acinetobacter baylyi*.** (A) Transformation assay of *A. baylyi* using a linear tDNA product with linked genetic markers. (B) Transformation assay performed in *Spec<sup>S</sup>* strains with tDNA that would revert the strain to *Spec<sup>R</sup>*. Integration of the marker would either repair a point mutation or delete 180 bp of genomic sequence. All strains in A and B contain *mutS* mutations to prevent MMR activity. In schematics above bar graphs, X's denote possible crossover points for homologous recombination. All data are shown as the mean  $\pm$  SD and are the result of at least three independent biological replicates. \*\*\* =  $p < 0.001$ .

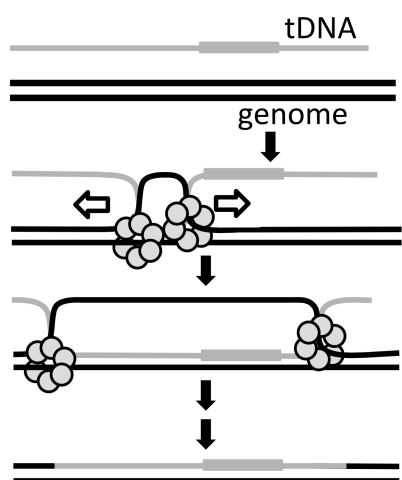

**Fig. 8** – *Proposed model for the role of ComM during natural transformation.* ComM is shown as a hexameric ring that promotes integration of tDNA via its bidirectional helicase and/or branch migration activity. This can support integration of tDNA with a heterologous region, which is indicated by a gray box.

## SUPPLEMENTARY FIGURES

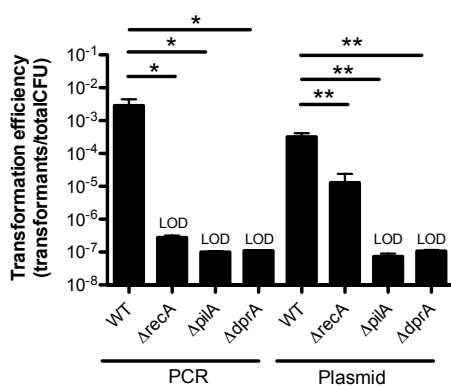

**Fig. S1** – Uptake of plasmid DNA is independent of recombination. Chitin-dependent transformation assay with the indicated strains using either linear PCR product or plasmid as tDNA. All data are shown as the mean ± SD and are the result of at least three independent biological replicates. \* =  $p < 0.05$ , \*\* =  $p < 0.01$ , and LOD = limit of detection.

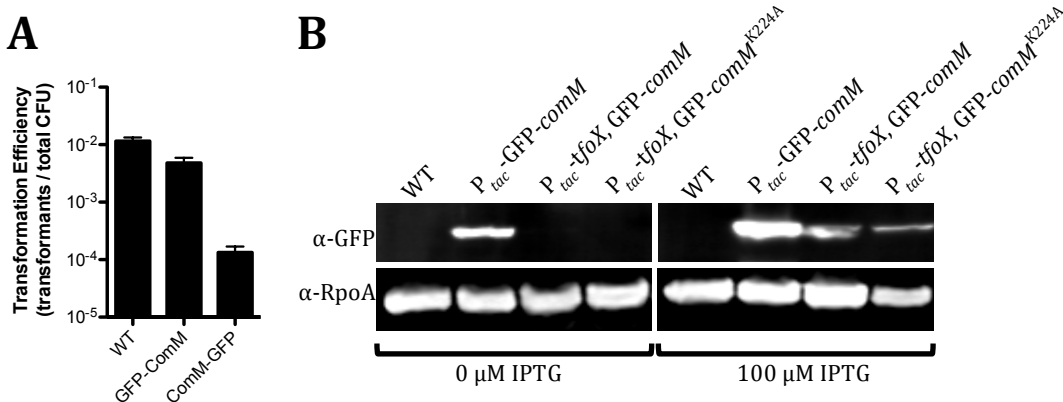

**Fig. S2** – N-terminal ComM fusions are functional. (A) Chitin-dependent transformation assay with the indicated strains using linear PCR product as the tDNA. (B) Representative western blot to detect GFP-ComM and RpoA (loading control) in the indicated strains grown in the presence or absence of 100 μM IPTG. Blot indicates that GFP-*comM* and GFP-*comM*<sup>K224A</sup> at the native locus are induced when TfoX is ectopically expressed to induce competence. Also, this blot indicates that the P<sub>tac</sub>-GFP-*comM* construct is leaky and expressed in the absence of inducer. Data in A are shown as the mean ± SD and are the result of at least three independent biological replicates.

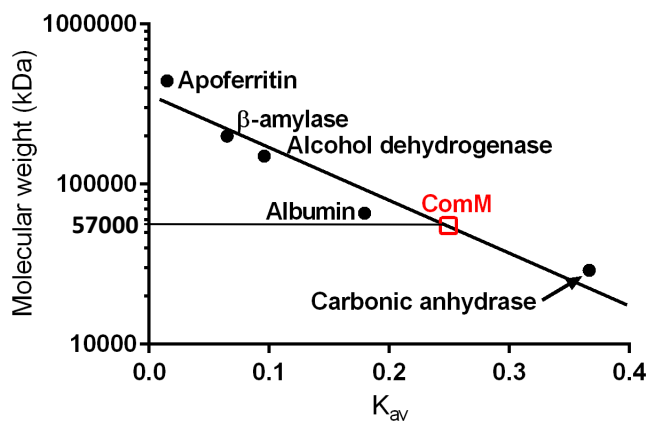

**Fig. S3** – *ComM* is monomeric in soluble form. Purified StrepII-*ComM* was analyzed by gel filtration and compared to a set of protein standards to determine size.

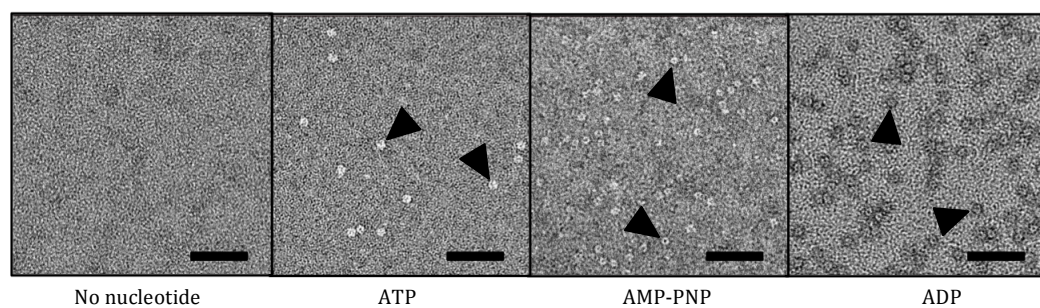

**Fig. S4** – *ComM* oligomerizes in the presence of ADP and AMP-PNP. Negative stain EM of purified *ComM* incubated with 5 μM ssDNA and 5 mM of the indicated nucleotide or nucleotide analog. Representative ring-like densities in these samples are indicated by black arrows. Scale bar = 50 nm.



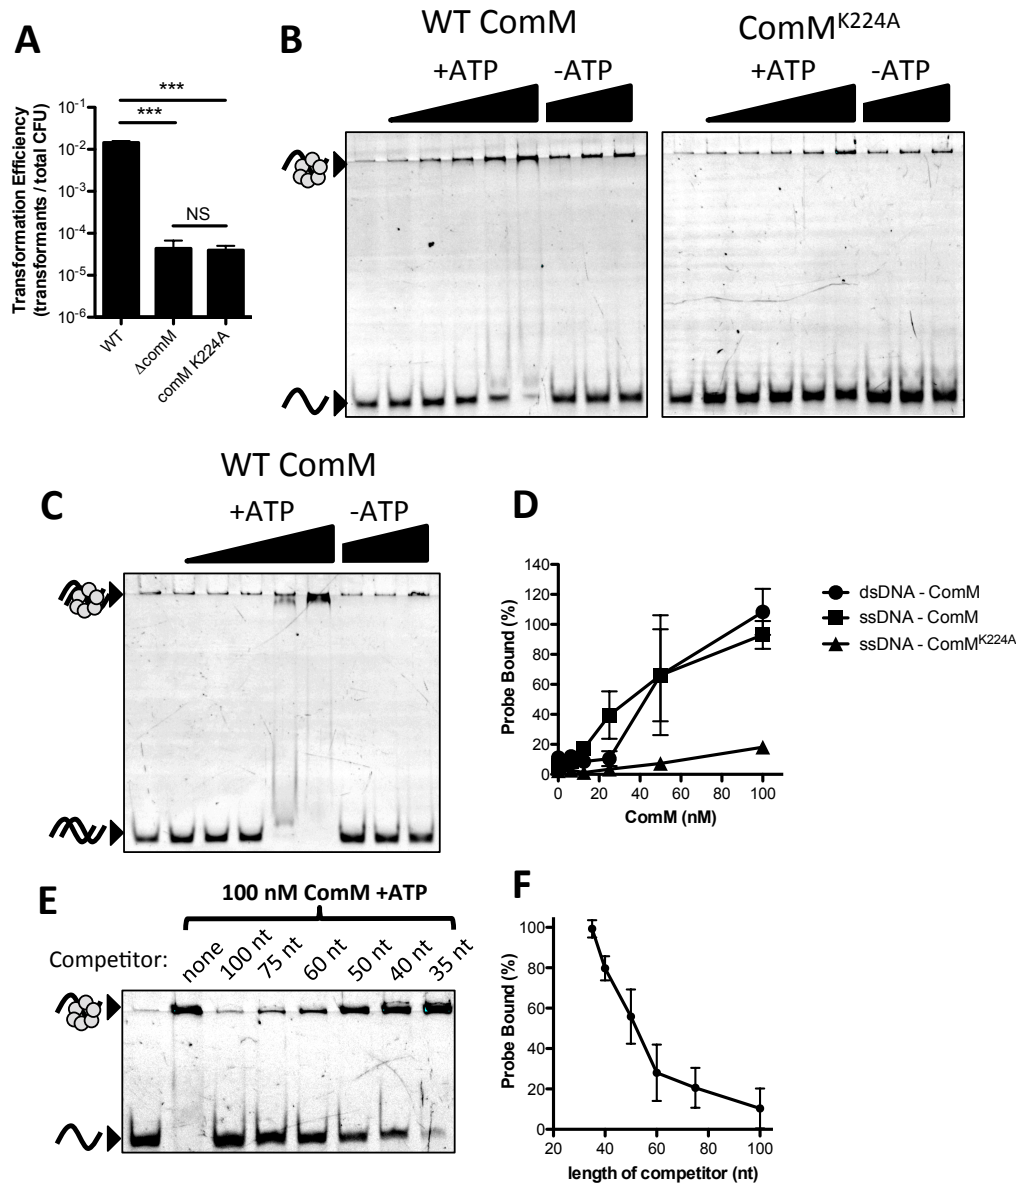

**Fig. S5 – ComM binds ssDNA in the presence of ATP.** (A) Chitin-dependent transformation assay of the indicated strains using a linear PCR product as tDNA. Data are shown as the mean  $\pm$  SD and are the result of at least three independent biological replicates. \*\*\* =  $p < 0.001$ , NS = not significant. (B) EMSA with purified ComM and ComM<sup>K224A</sup> and a ssDNA probe. Protein concentrations (of the hexamer) used in the presence of ATP (+ATP) were 0, 6.25, 12.5, 25, 50, 100 nM, and in the absence of ATP (-ATP) were 25, 50, and 100 nM. Bound probe is retained in the well due to the large size of the DNA-bound oligomeric complex. (C) Representative EMSA with purified ComM and dsDNA probe. All reactions were performed in the presence of ATP and the protein concentrations (of hexamer) used were the same as in B. (D) Replicate EMSAs from B and C were quantified and plotted as indicated. (E) A representative EMSA where binding was competed with cold competitor DNA of the indicated length. The labeled probe was a 100 nt poly-dT oligo. The cold competitor was of the length indicated (also poly-dT) and was added at 100X molar excess to the labeled probe. (F) Replicate EMSAs from E were quantified and plotted as indicated. Data in B, C, and E are representative of at least three independent experiments.

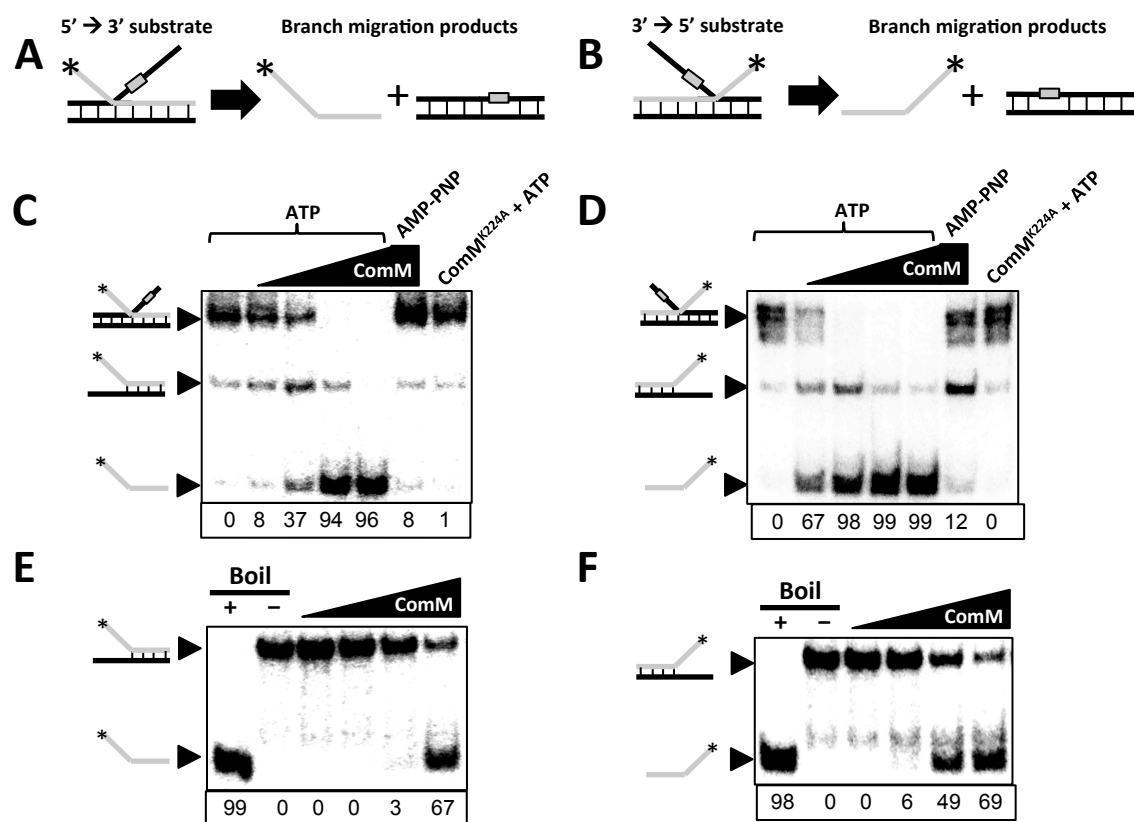

**Fig. S6** – *ComM* exhibits branch migration activity on short substrates in vitro. Schematics of the substrates used to test (A) 5'→3' and (B) 3'→5' branch migration activity. The gray box indicates a region on the substrate that is not homologous to the complementary strand. This was introduced to prevent spontaneous branch migration. The labeled strand has 60 bp of annealed sequence and a 30 nt tail (C and D) Representative branch migration assays using the substrates described in A and B, respectively. Substrates were incubated with 0, 25, 50, 100, or 200 nM WT *ComM* hexamer or 200 nM *ComM*<sup>K224A</sup> as indicated. Reactions were incubated with ATP or AMP-PNP as indicated. The % of final branch migration product generated at each concentration of *ComM* is indicated below each lane. (E and F) Representative helicase assays using forked substrates derived from the same oligos used to generate the three-stranded branch described in A and B, respectively. Substrates were incubated with 0, 25, 50, 100, or 200 nM WT *ComM* hexamer in the presence of ATP. The % of unwound product generated at each concentration of *ComM* is indicated below each lane. All data are representative of at least three independent experiments.

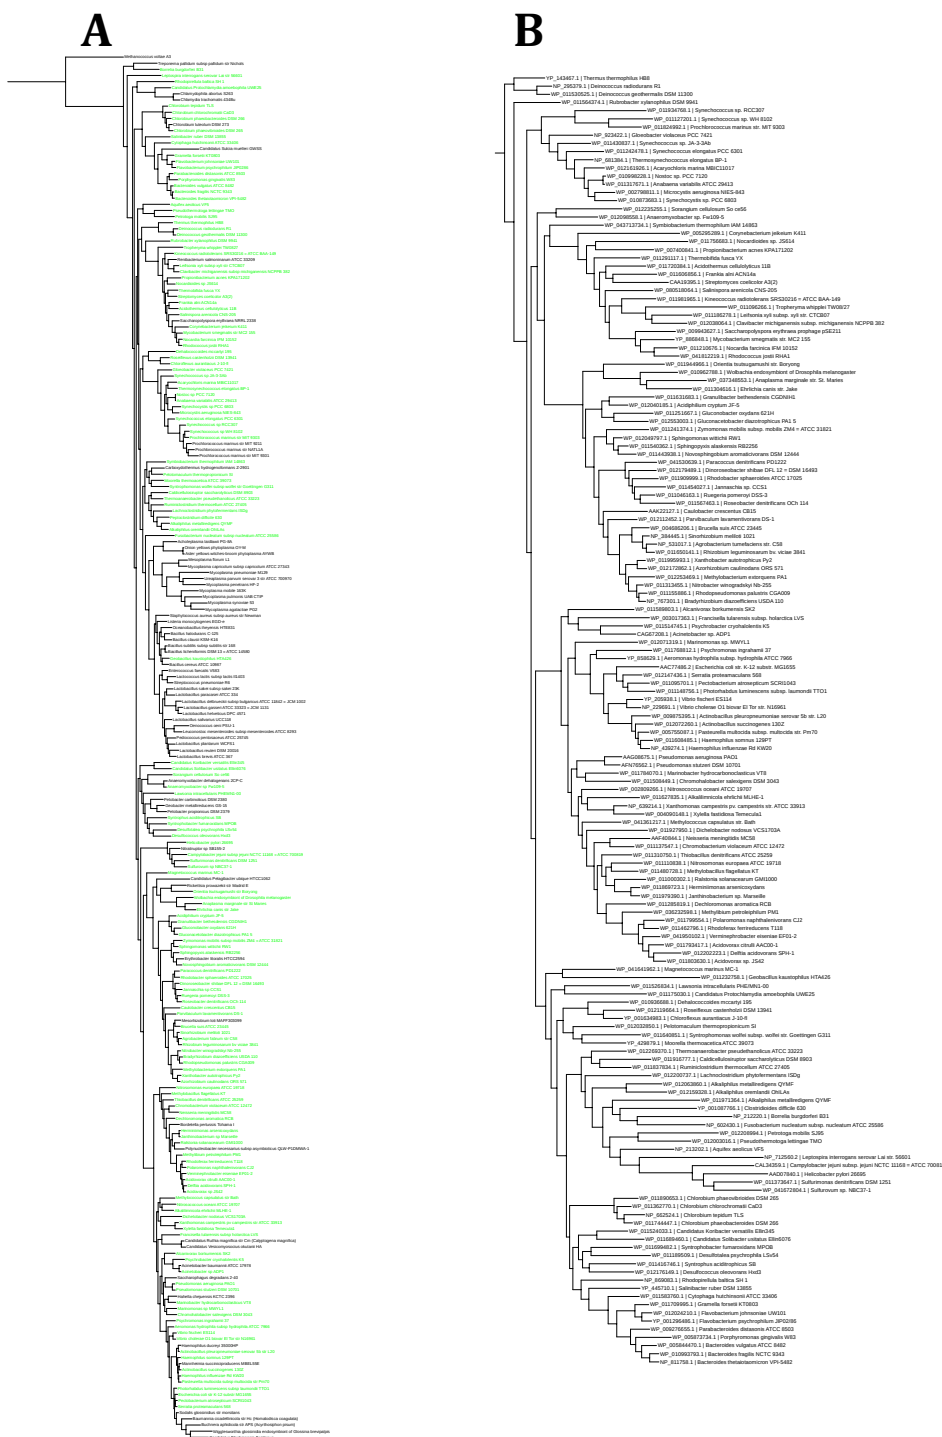

**Fig. S7 – *ComM* is broadly conserved.** (A) Phylogenetic trees of species based on a concatenated alignment of 36 conserved protein sequences. Green text indicates species with an identifiable *ComM* homolog. (B) Phylogenetic tree of *ComM* alleles.

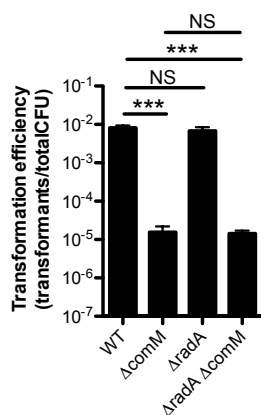

**Fig. S8** – *RadA* is not required for natural transformation in *V. cholerae*. All strains contain  $P_{tac}$ -*tfoX* mutations and were transformed via chitin-independent transformation assays using a linear PCR product as the tDNA. All data are shown as the mean  $\pm$  SD and the result of 6 independent biological replicates. \*\*\* =  $p < 0.001$ , NS = not significant.

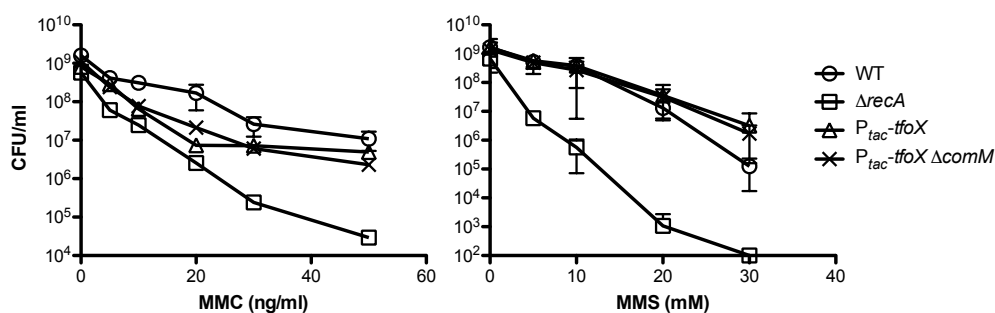

**Fig. S9** – *ComM* is not required for DNA repair. Strains were treated with increasing doses of the DNA damaging agent indicated on the X-axis and then plated for viability. All data are shown as the mean  $\pm$  SD and are the result of at least three independent biological replicates.

## SUPPLEMENTARY TABLES

**Table S1** – Strains used in this study

| Strain Name in Manuscript                      | Genotype and Antibiotic Resistances                                                                              | Description                                                                                                                                                                                                                                                          | Reference / strain#          |
|------------------------------------------------|------------------------------------------------------------------------------------------------------------------|----------------------------------------------------------------------------------------------------------------------------------------------------------------------------------------------------------------------------------------------------------------------|------------------------------|
| WT                                             | Sm <sup>R</sup>                                                                                                  | Wildtype <i>V. cholerae</i> O1 El Tor strain used throughout this study                                                                                                                                                                                              | (1) / (SAD030)               |
| <b>Strains Used for Transformation Assays</b>  |                                                                                                                  |                                                                                                                                                                                                                                                                      |                              |
| $\Delta comM$                                  | $\Delta VC0032::Spec^R$                                                                                          | Replacement of VC0032 with a spectinomycin resistance cassette                                                                                                                                                                                                       | This Study (SAD083)          |
| $P_{tac-tfoX}$                                 | VC1153 OE Kan <sup>R</sup>                                                                                       | OE Kan <sup>R</sup> = a fragment of the Tn10 transposon from pDL1093, including the <i>rrnB</i> antiterminator, <i>P<sub>tac</sub></i> , <i>LacI</i> , and Kan <sup>R</sup> . This fragment, and its use in overexpression of VC1153 ( <i>tfoX</i> ) is described in | (2) / (SAD061)               |
| $\Delta comM P_{tac-tfoX}$                     | VC0032::Spec <sup>R</sup> , VC1153 OE Kan <sup>R</sup>                                                           | Replacement of VC0032 with Spec <sup>R</sup> cassette in a VC1153 OE Kan <sup>R</sup> parent strain                                                                                                                                                                  | This Study (SAD066)          |
| $P_{tac-comM}$                                 | $P_{tac-comM}$ at <i>lacZ</i> locus Spec <sup>R</sup>                                                            | VC0032 fused with an IPTG inducible promoter at the <i>lacZ</i> locus                                                                                                                                                                                                | This Study (SAD1065)         |
| $\Delta recA$                                  | $\Delta recA::Spec^R$                                                                                            | Replacement of VC0543 with Spec <sup>R</sup> cassette                                                                                                                                                                                                                | This Study (SAD081)          |
| $\Delta pilA$                                  | $\Delta pilA::Spec^R$                                                                                            | Replacement of VC2423 with Spec <sup>R</sup> cassette                                                                                                                                                                                                                | This Study (SAD780)          |
| $\Delta dprA$                                  | $\Delta dprA::Spec^R$                                                                                            | Replacement of VC0048 with Spec <sup>R</sup>                                                                                                                                                                                                                         | This Study (SAD079)          |
| $P_{tac-comM}, \Delta comM$                    | $P_{tac-comM}$ at <i>lacZ</i> locus Spec <sup>R</sup> , $\Delta VC0032::Amp^R$                                   | VC0032 fused with an IPTG inducible promoter at the <i>lacZ</i> locus in a $\Delta comM$ parent strain                                                                                                                                                               | This Study (SAD1066)         |
| $\Delta 29bp$ (Tm <sup>S</sup> )               | $\Delta VC1807::TmR^*\Delta 29bp$ , $\Delta mutS$ MuGENT edit, LPQEN Kan <sup>R</sup>                            | $\Delta VC1807::TmR^*\Delta 29bp$ , $\Delta mutS$ MuGENT edit, LPQEN Kan <sup>R</sup> ; NOT Tm <sup>R</sup> resistant                                                                                                                                                | This Study (TND0226/SAD1321) |
| $\Delta 29bp$ (Tm <sup>S</sup> ) $\Delta comM$ | $\Delta comM::CarbR$ , ( $\Delta VC1807::TmR^*\Delta 29bp$ , $\Delta mutS$ MuGENT edit, LPQEN Kan <sup>R</sup> ) | VC0032 deletion in a Tm <sup>S</sup> parent strain                                                                                                                                                                                                                   | This Study (TND0229/SAD1322) |
| Point mutant (Tm <sup>S</sup> )                | $\Delta mutS$ MuGENT edit, LPQEN::Spec <sup>R</sup> , $\Delta VC1807::TmR^*TI$                                   | $\Delta mutS$ MuGENT edit, LPQEN::Spec <sup>R</sup> , $\Delta VC1807::TmR^*TI$ ; $\Delta VC1807::TmR^*TI$ is the Tm <sup>R</sup> cassette at VC1807, except it has a transition point mutation that introduces a premature stop codon.                               | This Study (TND0220/SAD1323) |
| Point mutant (Tm <sup>S</sup> ), $\Delta comM$ | $\Delta mutS$ MUGENT edit, $\Delta comM::CarbR$ , LPQEN::Kan <sup>R</sup> , $\Delta VC1807::TmR^*TI$             | $\Delta mutS$ MUGENT edit, $\Delta comM::CarbR$ , LPQEN::Kan <sup>R</sup> , $\Delta VC1807::TmR^*TI$ ; $\Delta VC1807::TmR^*TI$ is the Tm <sup>R</sup> cassette at VC1807, except it has a transition point mutation that introduces a premature stop codon.         | This Study (TND0221/SAD1324) |
| $comM^{K224A}$                                 | LPQEN::Kan <sup>R</sup> , $comM^{K224A}$                                                                         | K to A residue substitution disrupts ATP binding. FRT Kan cassette following the LPQEN amino acid sequence in <i>lacZ</i> (VC2338) used for                                                                                                                          | This Study (SAD1026)         |

|                                                      |                                                                                              |                                                                                                                                                                                                       |                                |
|------------------------------------------------------|----------------------------------------------------------------------------------------------|-------------------------------------------------------------------------------------------------------------------------------------------------------------------------------------------------------|--------------------------------|
|                                                      |                                                                                              | selection during co-transformation.                                                                                                                                                                   |                                |
| <i>gfp-comM</i>                                      | <i>gfp-comM</i>                                                                              | N-terminal GFP-comM at native locus                                                                                                                                                                   | This Study (SAD924)            |
| <i>comM-gfp</i>                                      | <i>comM-gfp</i>                                                                              | C-terminal comM-GFP at native locus                                                                                                                                                                   | This Study (SAD925)            |
| parent (ADP1)                                        | $\Delta$ ACIAD1551::P <sub>tac</sub> -lacZ, $\Delta$ mutS::Spec <sup>R</sup>                 | lacZ introduced into a defunct transposase (neutral gene = ACIAD1551), mutS deleted and replaced with Spec <sup>R</sup> (ACIAD1500)                                                                   | This Study (TND0137/SAD1325)   |
| $\Delta$ comM (ADP1)                                 | $\Delta$ ACIAD1551::P <sub>tac</sub> -lacZ, $\Delta$ mutS::Spec <sup>R</sup> , $\Delta$ comM | lacZ introduced into a defunct transposase (neutral gene = ACIAD1551), mutS deleted and replaced with Spec <sup>R</sup> (ACIAD1500), comM in-frame mutation (ACIAD0242)                               | This Study (TND0149/SAD1326)   |
| $\Delta$ 180 (ADP1)                                  | $\Delta$ mutS::Kan <sup>R</sup>                                                              | MutS deleted and replaced with a Kan <sup>R</sup> cassette                                                                                                                                            | This Study (SAD742)            |
| $\Delta$ 180 $\Delta$ comM (ADP1)                    | $\Delta$ mutS::Kan <sup>R</sup> , $\Delta$ comM                                              | MutS deleted and replaced with a Kan <sup>R</sup> cassette, $\Delta$ comM in-frame                                                                                                                    | This Study (TND0144/SAD1327)   |
| Point mutant (ADP1)                                  | ACIAD1551::Spec <sup>R</sup> (point mutant), $\Delta$ mutS::Kan <sup>R</sup>                 | SpecR cassette in ACIAD1551 is inactivated with a point mutation. MutS deleted and replaced with Kan <sup>R</sup>                                                                                     | This Study (TND0150/SAD1328)   |
| Point mutant, $\Delta$ comM (ADP1)                   | ACIAD1551::Spec <sup>R</sup> (point mutant), $\Delta$ mutS::Kan <sup>R</sup> , $\Delta$ comM | SpecR cassette in ACIAD1551 is inactivated with a point mutation. mutS was deleted and replaced with Kan <sup>R</sup> and comM was deleted in-frame                                                   | This Study (TND0164/SAD1329)   |
| pBAD18 Kan                                           | pBAD18 Kan                                                                                   | TG1 E. coli strain used to purify a replicating plasmid with a Kan <sup>R</sup> cassette                                                                                                              | This Study (SAD233)            |
| P <sub>tac</sub> -tfoX, $\Delta$ radA                | VC1153 OE Kan <sup>R</sup> , radA::Spec <sup>R</sup>                                         | radA (VC2343) deleted and replaced with Spec <sup>R</sup> in a TfoX overexpressing background.                                                                                                        | This Study (TMN0135/SAD1813)   |
| P <sub>tac</sub> -tfoX, $\Delta$ radA, $\Delta$ comM | VC1153 OE Kan <sup>R</sup> , radA::Spec <sup>R</sup> , comM::Carb <sup>R</sup>               | comM (VC0032) deleted and replaced with Carb <sup>R</sup> in a TfoX overexpressing, radA deletion background.                                                                                         | This Study (TMN0136/SAD1814)   |
| <b>Strains used in ComM Induction</b>                |                                                                                              |                                                                                                                                                                                                       |                                |
| P <sub>tac</sub> -gfp                                | P <sub>tac</sub> -GFPmut3 Spec <sup>R</sup> at the lacZ locus                                | Replaced lacZ gene in SAD030 with a fragment from the transposon vector pDL1098 which encodes LacI, SpecR and has a P <sub>tac</sub> promoter. Cloned GFPmut3 downstream of P <sub>tac</sub> promoter | This Study (SAD559)            |
| P <sub>tac</sub> -gfp-comM                           | P <sub>tac</sub> N-terminal <i>gfp-comM</i> at lacZ Spec <sup>R</sup> , $\Delta$ comM Kan    | VC0032 deletion strain containing an N-terminally GFP tagged comM at the lacZ locus under the control of P <sub>tac</sub>                                                                             | This Study (SAD921)            |
| <i>gfp-comM</i>                                      | N-terminal GFP-comM at the native locus                                                      | N-terminally GFP tagged comM was cloned into SAD030 at the native locus                                                                                                                               | This Study (SAD924)            |
| P <sub>tac</sub> -tfoX, <i>gfp-comM</i>              | VC1153 OE Kan <sup>R</sup> , N-terminally GFP-comM at the native locus                       | Amplified VC1153 OE Kan from SAD061 and cloned fragment into SAD924                                                                                                                                   | This Study (TMN0140 / SAD1320) |

|                                              |                                                                                 |                                                                                 |                                |
|----------------------------------------------|---------------------------------------------------------------------------------|---------------------------------------------------------------------------------|--------------------------------|
| $P_{tac-tfoX}$ ,<br>$gfp-comM^{K224A}$       | VC1153 OE $Kan^R$ , N-terminal $gfp-comM^{K224A}$ at the native locus, $Spec^R$ | Amplified $comM^{K224A}$ mutation from SAD1026 and cloned fragment into SAD1320 | This Study (TMN0148 / SAD1545) |
| <b>Strains Used for Protein Purification</b> |                                                                                 |                                                                                 |                                |
| ComM                                         | ComM cloned into $Amp^R$ StrepII expression vector                              | ComM N terminally tagged with 4x StrepII                                        | This Study (pMB486 / SAD1330)  |
| ComM <sup>K224A</sup>                        | ComM <sup>K224A</sup> cloned into $Amp^R$ StrepII expression vector             | ComM <sup>K224A</sup> N terminally tagged with 4x StrepII                       | This Study (pMB488 / SAD1331)  |
| Rosetta 2 (DE3)                              |                                                                                 | <i>E. coli</i> expression strain                                                | (pMB131/ SAD1332)              |

**Table S2- Primers used in this study-**

| Primer Name              | Primer Sequence (5' to 3')*                                  | Description                |
|--------------------------|--------------------------------------------------------------|----------------------------|
| <b>Mutant constructs</b> |                                                              |                            |
| ABD855                   | CATGAATCACTTTGGCATGAGG                                       | $\Delta comM$ F1           |
| ABD856                   | gtcgacggatccccggaatCATTGCTTCCCTTAGTATTTGATC                  | $\Delta comM$ R1           |
| ABD857                   | gaagcagctccagcctacaTAGTACTCTGACCTGCAGAGTTC                   | $\Delta comM$ F2           |
| ABD858                   | AAATTCAGAAAAACCACGTC                                         | $\Delta comM$ R2           |
| BBC749                   | CCGTGAAGCGAGCATGGTcgACCCGTCCCCGGAG                           | $comM^{K224A}$ R1          |
| BBC750                   | CTCCGGGACGGGTgcgACCATGCTCGCTTCACGG                           | $comM^{K224A}$ F2          |
| ABD812                   | AAATGGAGTTTGATCGCATTTGGC                                     | $\Delta recA$ F1           |
| ABD921                   | gtcgacggatccccggaatCATTACTCTCTCCGGATAGTCACTC                 | $\Delta recA$ R1           |
| ABD922                   | gaagcagctccagcctacaTAATCGGCAGGCTGAATGCAAAG                   | $\Delta recA$ F2           |
| ABD815                   | TGATCAGCGTTTGGAAATACGTCG                                     | $\Delta recA$ R2           |
| BBC401                   | ACCAGCAAAGCTAATAAAATCGAG                                     | $\Delta pilA$ F1           |
| BBC402                   | gtcgacggatccccggaatGAGCATATGCCTTGCTACACAAG                   | $\Delta pilA$ R1           |
| BBC403                   | gaagcagctccagcctacaACTGCAGGTGCAACAATTAATACTAA                | $\Delta pilA$ F2           |
| BBC404                   | CGCCATACTAACCCAATACACTC                                      | $\Delta pilA$ R2           |
| ABD820                   | CGCTCTTATCTGCTTGATAATGG                                      | $\Delta dprA$ F1           |
| ABD998                   | gtcgacggatccccggaatCATTAACTGGCATCATCAACC                     | $\Delta dprA$ R1           |
| ABD999                   | gaagcagctccagcctacaTAGCTATGATGATGGATATTTTGGATG               | $\Delta dprA$ F2           |
| ABD823                   | TGAAGTACAAGGCCAGTTACTGG                                      | $\Delta dprA$ R2           |
| BBC907                   | AAAGAGCAGTTGTCGCTAGAC                                        | $\Delta radA$ F1           |
| BBC908                   | gtcgacggatccccggaatCAATCCTCGAACTTGCTCTCAC                    | $\Delta radA$ R1           |
| BBC909                   | gaagcagctccagcctacaTAATGGGTAGTTGGTTTTGAAC                    | $\Delta radA$ F2           |
| BBC910                   | ATGAAGAAAATCTTAGTCCGCAG                                      | $\Delta radA$ R2           |
| ABD824                   | TTTAGCCCCATTGGCGAAGTGGG                                      | $\Delta mutS$ F1           |
| ABD825                   | GAGTATCTTTGACGTATTGGATCtcatattatactaCATAATCTTATGTCGCTGCTTATC | $\Delta mutS$ R1           |
| ABD826                   | GATAAGCAGCGACATAAGATTATGtagtataatgaGATCCAATACGTCAAAGATACTC   | $\Delta mutS$ F2           |
| ABD360                   | AGATCTTGCTGATGACGCTTTACTC                                    | $\Delta mutS$ R2           |
| BBC717                   | AAATAGATTTGGTGACTTTACCTCC                                    | VC1807::Ab <sup>R</sup> F1 |
| ABD340                   | gtcgacggatccccggaatACGTTTCATTAGTCACCTCTATTGTAACTGTTTC        | VC1807::Ab <sup>R</sup> R1 |
| ABD341                   | gaagcagctccagcctacaTAGTCGAAAATAAAAAAAGAGGCTCGCCTC            | VC1807::Ab <sup>R</sup> F2 |
| BBC718                   | CTTTACGCCTGATTGTCTACAC                                       | VC1807::Ab <sup>R</sup> R2 |

|                                                 |                                                                   |                                          |
|-------------------------------------------------|-------------------------------------------------------------------|------------------------------------------|
| ABD332                                          | GGCTGAACGTGGTTGTCGAAAATGAC                                        | lacZ F1                                  |
| ABD263                                          | gtcgacggatccccggaatAACTGATCCAATTTTTTCAGCGCATATTTTGG               | lacZ LPQEN::Ab <sup>R</sup> R1           |
| ABD262                                          | gaagcagctccagcctacaTGCCGCAGGAAAACCGCCCCCTaATC                     | lacZ LPQEN::Ab <sup>R</sup> F2           |
| ABD256                                          | CCCAAATACGGCAACTTGGCG                                             | lacZ R2                                  |
| ABD269                                          | gaagcagctccagcctacaAATTGTGTAAACGTTTCCACAATTTAAATAG<br>AGG         | Spec <sup>R</sup> upstream of lacZ<br>R1 |
| ABD268                                          | gtcgacggatccccggaatGGTGAGTGGTTCACAGAATCGGTG                       | Spec <sup>R</sup> upstream of lacZ<br>F2 |
| ABD495                                          | AAAAAATCTTCAATCGCGAGTATCGGGTaGCGGTAGAGATACACA<br>TCGCGAAAAGATGCC  | lacZ 820bp linked R1                     |
| ABD494                                          | TCTTTCGCGATGTGTATCTCTACCGCtAGCCGATACTCGCGATTGAA<br>GATTTTTTTTATCC | lacZ 820bp linked F2                     |
| ABD329                                          | GAACATGGGGTGTACGGCAGTGCCATTaAACGATGTGCGGGTTTTG<br>CCAATCTTG       | lacZ 245bp linked R1                     |
| ABD328                                          | CAAGATTGGCAAACCCGCACATCGTTtAATGGCACTGCCGTACACC<br>CCATGTTC        | lacZ 245bp linked F2                     |
| BBC1157                                         | GTA AAACTTGAACGTGTTACGAATTGATTCAAAAAGTCTTGCGTC                    | Tm <sup>R</sup> Δ29bp R1                 |
| BBC1158                                         | GACGCAAGACTTTTGAATCAATTCGTAACACGTTCAAGTTTTAC                      | Tm <sup>R</sup> Δ29bp F2                 |
| BBC747                                          | GTCCAACCAACAGCCATTGGTTtTAGGTAATAGCTTTAAACAGGAG<br>C               | Tm <sup>R</sup> Point mutation           |
| BBC748                                          | GCTCCTGTTTTAAAGCTATTACCTAaAACCAATGGCTGTTGGTTGGA<br>C              | Tm <sup>R</sup> Point mutation           |
| BBC498                                          | GGGTAACGCCAGGGTTTTTctCAGTCACGACGTTGTAAAAC                         | SpecR point mutant R1                    |
| BBC499                                          | GTTTTACAACGTCGTGACTGGtAAAACCCTGGCGTTACCC                          | SpecR point mutant F2                    |
| BBC280                                          | TCCACCACTTCCACctGCGACGTTCTGCGCACTGAGC                             | GFP-ComM R1                              |
| BBC351                                          | GTTCTTCTCCTTTACGCATTACGTTACCTCCTTTTGATCAAAAAGCC<br>TTCAGC         | ComM-GFP R1                              |
| BBC352                                          | GCaGGTGGAGCAGGTGGAGGACTTGCATCATTTCATAGC                           | ComM-GFP F2                              |
| ABD688                                          | CCACTGTTGCGCAGTTGAATACC                                           | tfoX OE Kan F1                           |
| ABD691                                          | ATGATGTCAAACCATGAACCCGG                                           | tfoX OE Kan R2                           |
| BBC331                                          | CAATTTACACAGGATCCCGGGAGGAGTAACGTAATGGGACTTGC<br>GATCATTTC         | P <sub>tac</sub> -comM F                 |
| BBC365                                          | tgtaggctggagctgcttcCTAGACGTTCTGCGCACTGAG                          | P <sub>tac</sub> -comM R                 |
| DOG0140                                         | GTTGCTGCATTTGTTTCGATCTG                                           | ΔcomM (ADP1) F1                          |
| DOG0141                                         | gtcgacggatccccggaatCATACTATTATTGTTCCATTATGGTGC                    | ΔcomM (ADP1) R1                          |
| DOG0142                                         | gaagcagctccagcctacaTATCGCAGTGAACATAGCTAAAA                        | ΔcomM (ADP1) F2                          |
| DOG0143                                         | ATCAGTGGTTGGGAAGGTG                                               | ΔcomM (ADP1) R2                          |
| <b>Inserts for cloning</b>                      |                                                                   |                                          |
| MB1225                                          | CGGGATCCATGGGACTTGCATCATTTCATAGCCG                                | comM ORF F1                              |
| MB1214                                          | CGATCGATCTCGAGCTAGACGTTCTGCGCACTGAGC                              | comM ORF R1                              |
| MB1215                                          | TATTGTTTCTCGGCCCTCCGGGGACGGGTGCGACCATGCTCGCTTACGG<br>CTGTGCGATT   | comM <sup>K224A</sup> F1                 |
| MB1216                                          | AATCGCACAGCCGTGAAGCGAGCATGGTCGCACCCGTCGCCGGAGGGC<br>CGAGAAACAATA  | comM <sup>K224A</sup> R1                 |
| <b>Oligomerization assays/Negative stain EM</b> |                                                                   |                                          |
| ABD363                                          | CGTTAAATGAAATTAATACGACTCACTATAGGGAGAGAGGTTTGCTGT<br>TTGAGAAGCC    | ssDNA substrate for<br>oligomerization   |
| <b>EMSA probes</b>                              |                                                                   |                                          |
| BBC742                                          | ATTCCGGGGATCCGTCGACCTGCAGTTCAGAAGCAGCTCCAGCCTACA                  | EMSA binding probe<br>(ssDNA, dsDNA)     |
| BBC743                                          | TGTAGGCTGGAGCTGCTTCTGAACTGCAGGTGACGGATCCCCGGAAT                   | EMSA binding probe<br>(dsDNA)            |



|                                                         |                                                                                                                                     |                                                                                |
|---------------------------------------------------------|-------------------------------------------------------------------------------------------------------------------------------------|--------------------------------------------------------------------------------|
| MB1040                                                  | TTT TTT<br>TTT TTT TTT<br>TTT T | 100 bp poly-dT ssDNA probe                                                     |
| MB1039                                                  | TTT TTT<br>TTT TTT          | 75 bp poly-dT ssDNA probe                                                      |
| MB1038                                                  | TTT TTT<br>TTT TTT TTT TTT                                                      | 60 bp poly-dT ssDNA probe                                                      |
| M551                                                    | TTT TTT<br>TT                                                                   | 50 bp poly-dT ssDNA probe                                                      |
| MB1037                                                  | TTT T                                                                           | 40 bp poly-dT ssDNA probe                                                      |
| MB1140                                                  | TTT TT                                                                                      | 35 bp poly-dT ssDNA probe                                                      |
| <b>Helicase substrates</b>                              |                                                                                                                                     |                                                                                |
| MB1167                                                  | TTTTTTTTTTTTTTTTTTTTTTTTTTTTTTTTGTGTCACACTCACATAGCGTTC                                                                              | Poly-dT 5' tail                                                                |
| MB1168                                                  | GAACGCTATGTGAGTGACACTTTTTTTTTTTTTTTTTTTTTTTTTTTTTTTTT                                                                               | Poly-dT 3' tail                                                                |
| MB1510                                                  | TTTTTTTTTTTTTTTTTTTTTTTTTTTTTTTT/ilnvdT/GTGTCACTCACATAGCGT<br>TC                                                                    | Poly-dT inverted 5' tail                                                       |
| MB1511                                                  | GAACGCTATGTGAGTGACAC/ilnvdT/TTTTTTTTTTTTTTTTTTTTTTTTTTTT<br>TTT                                                                     | Poly-dT inverted 3' tail                                                       |
| <b>Short three-stranded branch migration substrates</b> |                                                                                                                                     |                                                                                |
| BBC1916                                                 | TTTGATAAGAGGTCATTTTTGCGGATGGCTTAGAGCTTAATTGCT<br>GAATCTGGTGCTGTAGGTCAACATGTTGTAAATATGCAGCTAAAG                                      | 5' to 3' bottom strand                                                         |
| BBC1915                                                 | TTTTTTTTTTTTTTTTTTTTTTTTTTTTTTTTTTTACAGCACCAGATTCAGCA<br>ATTAAGCTCTAAGCCATCCGCAAAAATGACCTCTTATCAAA                                  | 5' to 3' top strand with polyDT tail (also for forked helicase substrate)      |
| BBC1917                                                 | CTTTAGCTGCATATTTACAACATGTTGACCTACAGCAAAGAATTCA<br>GCAATTAAGCTCTAAGCCATCCGCAAAAATGACCTCTTATCAAA                                      | 5' to 3' top strand for 3' branch                                              |
| BBC1913                                                 | CTTTAGCTGCATATTTACAACATGTTGACCTACAGCACCAGATTCA<br>GCAATTAAGCTCTAAGCCATCCGCAAAAATGACCTCTTATCAAA                                      | 3' to 5' bottom strand                                                         |
| BBC1912                                                 | TTTGATAAGAGGTCATTTTTGCGGATGGCTTAGAGCTTAATTGCT<br>GAATCTGGTGCTGTTTTTTTTTTTTTTTTTTTTTTTTTTTTTTTTTTTTTTTTT                             | 3' to 5' top strand with polyDT tail (also used for forked helicase substrate) |
| BBC1914                                                 | TTTGATAAGAGGTCATTTTTGCGGATGGCTTAGAGCTTAATTATA<br>AAATCTGGTGCTGTAGGTCAACATGTTGTAAATATGCAGCTAAAG                                      | 3' to 5' top strand for 5' branch                                              |

\*Lowercase letters indicate overlap sequences for SOE PCRs or mutated nucleotides when generating point mutations

## SUPPLEMENTARY METHODS

### Protein expression and purification

The *comM* open reading frame was PCR-amplified from *V. cholerae* genomic DNA using oligonucleotides MB1225 (CGGGATCCATGGGACTTGCGATCATTCATAGCCG) and MB1214 (CGATCGATCTCGAGCTAGACGTTCTGCGCACTGAGC), digested with *Bam*HI and *Xho*I, and ligated into the same sites in plasmid pMB131 to generate pMB486. This cloning added an N-terminal 4x Strep-tag II to the translated protein. The expression plasmid encoding the ATPase- and helicase-dead *comM-K224A* allele (pMB488) was created site-directed mutagenesis of pMB486 with oligonucleotides MB1215 (TATTGTTTCTCGGCCCTCCGGGGACGGGTGCGACCATGCTCGCTTCACGGCTGTGCGATT) and MB1216 (AATCGCACAGCCGTGAAGCGAGCATGGTCGCACCCGTCGCCGGAGGGCCGAGAAACAATA) and verified by DNA sequencing (ACGT, Inc.). Expression plasmids were transformed into Rosetta 2(DE3) pLysS cells and selected for at 37°C on LB medium supplemented with 100 µg/mL ampicillin and 34 µg/mL chloramphenicol. Fresh transformants were used to inoculate one or more 5-mL LB cultures supplemented with antibiotics and incubated at 30°C for ~6 h with aeration. These starter cultures were then diluted 1:100 in ZYP-5052 autoinduction medium containing 1x trace metals mix (3), 100 µg/mL ampicillin, and 34 µg/mL chloramphenicol and incubated at 22°C with agitation to OD<sub>600</sub> >3 (15-18 h). Cells were harvested by centrifugation for 10 min at 5,500 x g and 4°C. Cell pellets were weighed and frozen at -80°C prior to lysis or for long-term storage.

Frozen cell pellets were thawed at room temperature by stirring in 4 mL/g cell pellet resuspension buffer (25 mM Na-HEPES (pH 7.5), 5% (v/v) glycerol, 300 mM NaOAc, 5 mM MgOAc, and 0.05% Tween-20) supplemented with 1x protease inhibitor cocktail (Sigma), and 20 µg/mL DNase I. Cells were lysed by six passes through a Cell Cracker operated at >1000 psi. All subsequent steps were performed at 4°C. The soluble fraction was clarified by centrifugation for 30 min at 33,000 x g followed by filtering the supernatant through a 0.22-µm membrane. This mixture was then applied to a Strep-Tactin Sepharose column (IBA) pre-equilibrated in resuspension buffer using an ÄKTA Pure (GE Healthcare Life Sciences). The column was washed with 20 column volumes (CVs) of resuspension buffer, 10 CVs of resuspension buffer supplemented with 5 mM ATP, and 10 CVs of resuspension buffer. Protein was eluted with 15 CVs of resuspension buffer supplemented with 2.5 mM desthiobiotin (IBA). Column fractions were examined on 8% SDS-PAGE gels run at 20 V/cm and stained with Coomassie Brilliant Blue R-250 (BioRad). Peak fractions were pooled, concentrated with Amicon Ultra-4 30K centrifugal filters, and loaded onto a HiPrep 16/60 Sephacryl S-200 HR column (GE Healthcare Life Sciences) pre-equilibrated in gel filtration buffer (25 mM Na-HEPES (pH 7.5), 5% glycerol, 300 mM NaCl, 5 mM MgCl<sub>2</sub>, and 0.05% Tween-20). The protein was eluted with 1.5 CVs gel filtration buffer, and fractions were analyzed by SDS-PAGE as above. Peak fractions were pooled, snap-frozen with liquid nitrogen, and stored at -80°C.

The *Saccharomyces cerevisiae* Pif1 helicase was overexpressed in Rosetta cells from plasmid pMB330 as described for ComM above. Pif1 purification was likewise identical, except the protein from the Strep-Tactin column was polished by Ni-affinity chromatography instead of size exclusion. Briefly, the pooled peak fractions were applied to a His60 Ni Superflow (Clontech) gravity column, washed with 10 CVs resuspension buffer supplemented with 25 mM imidazole (pH 8), and eluted with 4.5 CVs of a step gradient of resuspension buffer containing 100 mM, 250, and 500 mM imidazole (pH 8). Peak fractions were pooled, buffer exchanged into storage buffer (4), snap-frozen

with liquid nitrogen, and stored at  $-80^{\circ}\text{C}$ . The *Mycobacterium smegmatis* SftH was purified exactly as previously described (5).

ComM preps were tested for nuclease activity by incubating a labeled ssDNA probe with 100 nM of each protein prep in resuspension buffer for 1 hour at  $37^{\circ}\text{C}$ . Samples were then deproteinated with 1X stop load buffer and separated by native PAGE to assess degradation of the probe. All ComM protein preps used lacked detectable nuclease activity.

### Blue native PAGE

Oligomerization of ComM protein was assayed using Blue Native PAGE electrophoresis. 2.5  $\mu\text{M}$  purified ComM was incubated for 30 min at room temperature in reaction buffer [10 mM Tris-HCl pH7.5, 20mM KCl, 1mM DTT, 10% Glycerol] with 5 mM ATP and/or 5 nM ssDNA (oligo ABD363) where indicated. 1  $\mu\text{L}$  20x sample buffer [5% Coomassie G-250, 0.5 M aminocaproic acid pH 7] was added to each reaction and samples were run on 4-16% Native PAGE gels [gel buffer = 0.5 M aminocaproic acid pH 7.0, 0.05 M Bis-Tris pH 7.0]. The cathode buffer was composed of 50 mM Tricine, 15 mM Bis-Tris pH 7.0, 0.02% Coomassie G-250, while the anode buffer was composed of 50 mM Bis-Tris pH 7.0. Samples were run at 150 V for 30 min, then 200 V for 45 min.

### Negative stain electron microscopy

The nominal magnification for the images is 60,000x, which is equivalent to 1.8  $\text{\AA}$  per pixel at the final image. Initial image processing, particle boxing, and CTF determination were performed using EMAN2 (6). A phase-flipped particle dataset was then imported into Relion (7) for 2D classification. Classes showing noisy images were discarded at this stage. As we observed clear six-fold symmetry from the classes, the subsequent processing imposed C6 symmetry. The remaining “good” classes were used to generate the initial models using e2initialmodel.py. The 3D classification was carried out using the initial model that was low-pass filtered to 40  $\text{\AA}$  to eliminate the possible effect from the model bias. Three 3D classes were obtained; the highest population (46%) of the classes was subjected to further structure refinement in Relion. Approximately 32,958 particles were used to generate the final 3D reconstruction. The reported resolution is  $\sim 13.8 \text{\AA}$  using gold-standard Fourier shell correlation at a 0.143 cutoff; however, it is an over-estimated value because of the use of negative stain. The structure is rendered using UCSF Chimera (8).

### Helicase Assays

Fork substrates for helicase assays were made by 5'-end labelling oligonucleotides (**Table S2**) with T4 polynucleotide kinase (T4 PNK; NEB) and  $\gamma$ [ $^{32}\text{P}$ ]-ATP. Labelled oligonucleotides were separated from free label using illustra ProbeQuant G-50 micro columns (GE Healthcare) following the manufacturer's instructions. Oligonucleotides were annealed by incubation with an equimolar amount of partially complementary oligonucleotides overnight at  $37^{\circ}\text{C}$  in annealing buffer (20 mM Tris-HCl [pH 8], 4% glycerol, 0.1 mM EDTA, 40  $\mu\text{g}/\text{mL}$  BSA, 10 mM DTT, and 10 mM MgOAc) (9).

The DNA fork that allows for 5'-3' and 3'-5' activity was made by annealing oligonucleotides MB1167 with MB1168. The DNA fork that only allows for 5'-3' helicase activity was made by

annealing MB1167 / MB1511. The DNA fork that only allows for 3'-5' helicase activity was made by annealing MB1168 / MB1510. DNA unwinding was assessed by incubating the indicated concentrations of helicase with 5 mM ATP and 0.1 nM radiolabelled fork in resuspension buffer. Reactions were incubated at 37°C for 30 min and stopped with the addition of 1x Stop-Load dye (5% glycerol, 20 mM EDTA, 0.05% SDS, and 0.25% bromophenol blue) supplemented with 400 µg/mL Proteinase K followed by a 10-min incubation at 37°C. Unwound DNA was then separated on 8% 19:1 acrylamide:bis-acrylamide gels in TBE buffer at 10 V/cm. Gels were dried under vacuum and imaged using a Typhoon 9210 Variable Mode Imager. DNA binding was quantified using ImageQuant 5.2 software.

## SI REFERENCES

1. Miller, V.L., DiRita, V.J. and Mekalanos, J.J. (1989) Identification of *toxS*, a regulatory gene whose product enhances *toxR*-mediated activation of the cholera toxin promoter. *J Bacteriol*, **171**, 1288-1293.
2. Dalia, A.B., Lazinski, D.W. and Camilli, A. (2014) Identification of a membrane-bound transcriptional regulator that links chitin and natural competence in *Vibrio cholerae*. *MBio*, **5**, e01028-01013.
3. Studier, F.W. (2005) Protein production by auto-induction in high density shaking cultures. *Protein Expr Purif*, **41**, 207-234.
4. Paeschke, K., Bochman, M.L., Garcia, P.D., Cejka, P., Friedman, K.L., Kowalczykowski, S.C. and Zakian, V.A. (2013) Pif1 family helicases suppress genome instability at G-quadruplex motifs. *Nature*, **497**, 458-462.
5. Yakovleva, L. and Shuman, S. (2012) *Mycobacterium smegmatis* SftH exemplifies a distinctive clade of superfamily II DNA-dependent ATPases with 3' to 5' translocase and helicase activities. *Nucleic Acids Res*, **40**, 7465-7475.
6. Tang, G., Peng, L., Baldwin, P.R., Mann, D.S., Jiang, W., Rees, I. and Ludtke, S.J. (2007) EMAN2: an extensible image processing suite for electron microscopy. *Journal of structural biology*, **157**, 38-46.
7. Scheres, S.H. (2012) RELION: implementation of a Bayesian approach to cryo-EM structure determination. *Journal of structural biology*, **180**, 519-530.
8. Pettersen, E.F., Goddard, T.D., Huang, C.C., Couch, G.S., Greenblatt, D.M., Meng, E.C. and Ferrin, T.E. (2004) UCSF Chimera--a visualization system for exploratory research and analysis. *J Comput Chem*, **25**, 1605-1612.
9. Kanter, D.M. and Kaplan, D.L. (2011) Sld2 binds to origin single-stranded DNA and stimulates DNA annealing. *Nucleic Acids Res*, **39**, 2580-2592.
